# Supplementary material for: Sequential addition of neuronal stem cell temporal cohorts generates a feed-forward circuit in the Drosophila larval nerve cord
Source: eLife. 2022 Jun 20;11:e79276. doi: 10.7554/eLife.79276 (PMC9333992; doi:10.7554/eLife.79276)
Supplement: Figure 3—source data 1. [file elife-79276-fig3-data1.xlsx]

## Sheet: Sheet1
	Cortex Neuron Length (microns)
neuron name	A1L	A1R	Average	Birth order
MN22/23	10.15	11.68	10.915	0
A08 undiff	10.59	11.82	11.205	0
A08x	12.5	17.78	15.14	1
A08j1	16.09	12.8	14.445	2
A08j3	18.82	20.12	19.47	3
A08j2	21.72	14.93	18.325	4
A08m	23.96	21.58	22.77	5
A08o	19.75	26.89	23.32	6
A08c	21.37	22.39	21.88	7
A08s	25.01	23.24	24.125	8
A08e3	25.03	28.1	26.565	9
A08e1	29.02	23.5	26.26	10
A08e2	22.34	25.13	23.735	11
