# Supplementary material for: Sequential addition of neuronal stem cell temporal cohorts generates a feed-forward circuit in the Drosophila larval nerve cord
Source: eLife. 2022 Jun 20;11:e79276. doi: 10.7554/eLife.79276 (PMC9333992; doi:10.7554/eLife.79276)
Supplement: Figure 4—source data 2. [file elife-79276-fig4-data2.xlsx]

## Sheet: Sheet1
							Number of synapses onto neuron
SKELETON ID	Neuron Name	New neuron name used in this study	Type	Category	Segment	Side	Undiff A1L	Undiff A1R	MN22/23 A1L	MN22/23 A1R	A08x A1L	A08x A1R	A08j1 A1L	A08j1 A1R	A08j3 A1L	A08j3 A1R	A08j2 A1L	A08j2 A1R	A08m A1L	A08m A1R	A08o A1L	A08o A1R	A08c A1L	A08c A1R	A08s A1L	A08s A1R	A08e3 A1L	A08e3 A1R	A08e1 A1L	A08e1 A1R	A08e2 A1L	A08e2 A1R
1295146	lch5_a5r (sensory neuron 1295147)		Sensory	CHO	A5	right	0	0	0	0	0	0	2	0	0	0	0	0	0	0	0	0	0	0	0	0	0	0	0	0	0	0
196616	lch5-1_a4l		Sensory	CHO	A4	left	0	0	0	0	0	0	0	0	0	0	0	2	0	0	0	0	0	0	0	0	0	0	0	0	0	0
309781	lch5-1_a5l		Sensory	CHO	A5	left	0	0	0	0	0	0	0	0	0	0	0	1	0	0	0	0	0	0	0	0	0	0	0	0	0	0
7551402	lch5-1_t3r		Sensory	CHO	T3	right	0	0	0	0	0	2	0	0	0	0	0	0	1	0	0	0	0	0	0	0	0	0	0	0	0	0
7208962	lch5-1ish_t2l (neuron 720896)		Sensory	CHO	T2	left	0	0	0	0	1	0	0	0	0	0	0	0	0	0	0	0	0	0	0	0	0	0	0	0	0	0
7418771	lch5-2/4 ?		Sensory	CHO			0	0	0	0	0	0	3	1	0	2	0	0	0	0	0	0	0	0	0	0	0	0	0	0	0	0
162293	lch5-2/4 a1l		Sensory	CHO	A1	left	0	0	0	0	0	0	1	4	2	2	0	0	0	1	0	0	0	0	0	0	0	0	0	0	0	0
159280	lch5-2/4 a1l		Sensory	CHO	A1	left	0	0	0	0	0	0	3	3	1	0	0	0	0	3	0	0	0	0	0	0	0	0	0	0	0	0
7577773	lch5-2/4 a1r		Sensory	CHO	A1	right	0	0	0	0	0	0	1	3	0	2	0	0	0	0	0	0	0	0	0	0	0	0	0	0	0	0
6276557	lch5-2/4 a1r		Sensory	CHO	A1	right	0	0	0	0	0	0	5	5	1	1	0	0	0	0	0	0	0	0	0	0	0	0	0	0	0	0
2792430	lch5-2/4 a2l		Sensory	CHO	A2	left	0	0	0	0	0	0	2	3	0	1	0	0	0	0	0	0	0	0	0	0	0	0	0	0	0	0
14966464	lch5-2/4 a2l		Sensory	CHO	A2	left	0	0	0	0	0	0	5	1	0	0	0	0	0	0	0	0	0	0	0	0	0	0	0	0	0	0
15608857	lch5-2/4 a2r		Sensory	CHO	A2	right	0	0	0	0	0	0	1	1	0	2	0	0	0	0	0	0	0	0	0	0	0	0	0	0	0	0
7577083	lch5-2/4 a2r		Sensory	CHO	A2	right	0	0	0	0	0	0	0	2	0	0	0	0	0	0	0	0	0	0	0	0	0	0	0	0	0	0
769563	lch5-2/4_a3l		Sensory	CHO	A3	left	0	0	0	0	0	0	17	5	2	2	0	0	0	0	0	0	0	0	0	0	0	0	0	0	0	0
7498606	lch5-2/4_a3r		Sensory	CHO	A3	right	0	0	0	0	0	0	5	0	0	1	0	0	0	0	0	0	0	0	0	0	0	0	0	0	0	0
7472862	lch5-2/4_a3r		Sensory	CHO	A3	right	0	0	0	0	0	0	4	0	0	0	0	0	0	0	0	0	0	0	0	0	0	0	0	0	0	0
131382	lch5-2/4_a4l		Sensory	CHO	A4	left	0	0	0	0	0	0	6	7	3	0	0	0	0	0	0	0	0	0	0	0	0	0	0	0	0	0
218296	lch5-2/4_a4l		Sensory	CHO	A4	left	0	0	0	0	0	0	5	2	1	0	2	0	0	0	0	0	0	0	0	0	0	0	0	0	0	0
819698	lch5-2/4_a4r		Sensory	CHO	A4	right	0	0	0	0	0	0	8	5	1	2	0	0	0	0	0	0	0	0	0	0	0	0	0	0	0	0
20308532	lch5-2/4_a4r		Sensory	CHO	A4	right	0	0	0	0	0	0	4	2	3	0	0	0	0	0	0	0	0	0	0	0	0	0	0	0	0	0
115880	lch5-2/4_a5l		Sensory	CHO	A5	left	0	0	0	0	0	0	9	5	2	3	0	0	0	0	0	0	0	0	0	0	0	0	0	0	0	0
11023891	lch5-2/4_a5l		Sensory	CHO	A5	left	0	0	0	0	0	0	3	0	2	3	0	0	0	0	0	0	0	0	0	0	0	0	0	0	0	0
2282599	lch5-2/4_a5r (sensory neuron 2282600)		Sensory	CHO	A5	right	0	0	0	0	0	0	5	3	2	3	0	0	0	0	0	0	0	0	0	0	0	0	0	0	0	0
230801	lch5-2/4_a6l		Sensory	CHO	A6	left	0	0	0	0	0	0	10	4	0	0	0	0	0	0	0	0	0	0	0	0	0	0	0	0	0	0
830870	lch5-2/4_a6l		Sensory	CHO	A6	left	0	0	0	0	0	0	11	3	0	0	0	0	0	0	0	0	0	0	0	0	0	0	0	0	0	0
2342719	lch5-2/4_a6r		Sensory	CHO	A6	right	0	0	0	0	0	0	7	4	3	1	0	0	0	0	0	0	0	0	0	0	0	0	0	0	0	0
145480	lch5-2/4_a7l		Sensory	CHO	A7	left	0	0	0	0	0	0	9	2	2	1	0	0	0	0	0	0	0	0	0	0	0	0	0	0	0	0
2349558	lch5-2/4_a7r		Sensory	CHO	A7	right	0	0	0	0	0	0	2	0	1	5	0	0	0	0	0	0	0	0	0	0	0	0	0	0	0	0
2820201	lch5-2/4_a7r (sensory neuron 2820202)		Sensory	CHO	A7	right	0	0	0	0	0	0	5	4	2	4	0	0	0	0	0	0	0	0	0	0	0	0	0	0	0	0
11044044	lch5-2/4_a8/9l		Sensory	CHO	A8	left	0	0	0	0	0	0	19	3	7	4	0	0	0	0	0	0	0	0	0	0	0	0	0	0	0	0
20295083	lch5-2/4_a8/9r		Sensory	CHO	A8	right	0	0	0	0	0	0	8	14	3	11	0	0	0	0	0	0	0	0	0	0	0	0	0	0	0	0
11023963	lch5-2/4_a8l		Sensory	CHO	A8	left	0	0	0	0	0	0	5	4	0	0	0	0	0	0	0	0	0	0	0	0	0	0	0	0	0	0
2294672	lch5-2/4_a8l (bundles with)		Sensory	CHO	A8	left	0	0	0	0	0	0	2	2	0	1	0	0	0	0	0	0	0	0	0	0	0	0	0	0	0	0
928405	lch5-2/4_a9r (bundles with)		Sensory	CHO	A9	right	0	0	0	0	0	0	1	0	0	0	0	0	0	0	0	0	0	0	0	0	0	0	0	0	0	0
3586415	lch5-2/4_l unknown		Sensory	CHO		left	0	0	0	0	0	0	1	5	1	3	0	0	0	0	0	0	0	0	0	0	0	0	0	0	0	0
15560552	lch5-2/4_r unknown		Sensory	CHO		right	0	0	0	0	0	0	7	11	1	4	0	0	0	0	0	0	0	0	0	0	0	0	0	0	0	0
1171920	lch5-2/4_t1l? sensory neuron 1171921		Sensory	CHO	T1	left	0	0	0	0	0	0	8	0	0	0	0	0	0	0	0	0	0	0	0	0	0	0	0	0	0	0
7534835	lch5-2/4_t1r (sensory neuron 7534836)		Sensory	CHO	T1	right	0	0	0	0	0	0	0	2	0	2	1	0	0	0	0	0	0	0	0	0	0	0	0	0	0	0
15870533	lch5-2/4_t2l (neuron 15870533)		Sensory	CHO	T2	left	0	0	0	0	0	0	9	1	0	0	3	0	0	0	0	0	0	0	0	0	0	0	0	0	0	0
15870382	lch5-2/4_t2l (sensory neuron 15870383)		Sensory	CHO	T2	left	0	0	0	0	0	0	6	0	0	0	3	0	0	0	0	0	0	0	0	0	0	0	0	0	0	0
7576854	lch5-2/4_t2r		Sensory	CHO	T2	right	0	0	0	0	0	0	15	0	0	0	0	0	0	0	0	0	0	0	0	0	0	0	0	0	0	0
20295030	lch5-2/4_t2r (sensory neuron 20295031)		Sensory	CHO	T2	right	0	0	0	0	0	0	0	6	0	2	0	0	0	0	0	0	0	0	0	0	0	0	0	0	0	0
17277897	lch5-2/4_t3l (sensory neuron 17277898)		Sensory	CHO	T3	left	0	0	0	0	0	0	1	0	0	0	0	0	0	2	0	0	0	0	0	0	0	0	0	0	0	0
2294761	lch5-2/4? putative		Sensory	CHO			0	0	0	0	0	0	3	2	1	1	0	0	0	0	0	0	0	0	0	0	0	0	0	0	0	0
17644150	lch5-2/4? sensory_a9r (neuron 17644151)		Sensory	CHO	A9	right	0	0	0	0	0	0	0	0	0	0	6	4	0	0	0	0	0	0	0	0	0	0	0	0	0	0
7476448	lch5-2ish_t3r		Sensory	CHO	T3	right	0	0	0	0	0	0	0	4	0	0	0	0	0	0	0	0	0	0	0	0	0	0	0	0	0	0
8031834	lch5-3 a1l		Sensory	CHO	A1	left	0	0	0	0	0	0	0	0	1	1	0	0	0	1	0	0	0	0	0	0	0	0	0	0	0	0
15577519	lch5-3 a2r		Sensory	CHO	A2	right	0	0	0	0	0	0	0	0	0	1	0	0	0	0	0	0	0	0	0	0	0	0	0	0	0	0
207983	lch5-3_a4l		Sensory	CHO	A4	left	0	0	0	0	0	0	0	0	0	0	0	2	0	0	0	0	0	0	0	0	0	0	0	0	0	0
309974	lch5-3_a5r		Sensory	CHO	A5	right	0	0	0	0	0	0	0	0	0	0	0	4	0	0	0	0	0	0	0	0	0	0	0	0	0	0
927468	lch5-3_a9r (bundles with)		Sensory	CHO	A9	right	0	0	0	0	0	0	0	0	0	0	0	7	0	0	0	0	0	0	0	0	0	0	0	0	0	0
19293747	lch5-3?_a6l (sensory neuron 19293748)		Sensory	CHO	A6	left	0	0	0	0	0	0	0	0	0	0	0	6	0	0	0	0	0	0	0	0	0	0	0	0	0	0
6753438	lch5-3/5_a2l (neuron 6753439)		Sensory	CHO	A2	left	0	0	0	0	0	0	0	0	0	0	0	3	0	0	0	0	0	0	0	0	0	0	0	0	0	0
1302614	lch5-3/5ish sensory neuron 1302615_a5r		Sensory	CHO	A5	right	0	0	0	0	0	0	0	0	0	0	8	1	0	0	0	0	0	0	0	0	0	0	0	0	0	0
20429402	lch5-3ish sensory neuron 20429403_t1r		Sensory	CHO	T1	right	0	0	0	0	0	0	0	0	0	0	1	0	0	0	0	0	0	0	0	0	0	0	0	0	0	0
20281507	lch5-3ish_a7l (sensory neuron 20281508)		Sensory	CHO	A7	left	0	0	0	0	0	0	0	0	0	0	0	6	0	0	0	0	0	0	0	0	0	0	0	0	0	0
20302953	lch5-3ish_a7r (sensory neuron 20302954)		Sensory	CHO	A7	right	0	0	0	0	0	0	1	0	0	0	3	0	0	0	0	0	0	0	0	0	0	0	0	0	0	0
7763691	lch5-5 a1l		Sensory	CHO	A1	left	0	0	0	0	0	0	0	0	0	0	0	2	0	4	0	0	0	0	0	0	0	0	0	0	0	0
7694722	lch5-5 a1r		Sensory	CHO	A1	right	0	0	0	0	0	3	0	0	0	0	1	2	1	0	0	0	0	0	0	0	0	1	0	0	0	0
16394599	lch5-5ish sensory neuron 16394600		Sensory	CHO			0	0	0	0	0	0	0	0	0	0	0	1	0	0	0	0	0	0	0	0	0	0	0	0	0	0
842303	lch5-5ish sensory neuron_a4r		Sensory	CHO	A4	right	0	0	0	0	0	0	0	0	0	0	5	3	0	0	0	0	0	0	0	0	0	0	0	0	0	0
20295495	lch5-5ish_a3l (likely) sensory neuron 20295496		Sensory	CHO	A3	left	0	0	0	0	0	0	0	0	0	1	0	2	0	0	0	0	0	0	0	0	0	0	0	0	0	0
1047461	lch5-5ish_t2l (neuron 1047461)		Sensory	CHO	T2		0	0	0	0	1	0	0	0	0	0	0	0	0	0	0	0	0	0	0	0	0	0	0	0	0	0
7577924	lch5-5ish_t2r		Sensory	CHO	T2		0	0	0	0	0	0	1	0	0	0	0	9	0	0	0	0	0	0	0	0	0	0	0	0	0	0
7210938	lch5-5ish_t3l (neuron 7210939)		Sensory	CHO	T3		0	0	0	0	2	0	0	0	0	0	1	5	0	5	0	0	0	0	0	0	0	0	0	0	0	0
15521040	lch5-5ish_t3r		Sensory	CHO	T3		0	0	0	0	3	1	0	0	0	0	4	9	5	0	0	0	0	0	0	0	0	0	0	0	0	0
853498	lch5? sensory neuron Fragment		Sensory	CHO			0	0	0	0	0	0	0	0	0	0	3	0	0	0	0	0	0	0	0	0	0	0	0	0	0	0
7801255	v'ch a1l		Sensory	CHO	A1	left	0	0	0	0	0	0	0	0	0	0	0	0	0	1	0	0	0	0	0	0	0	0	0	0	0	0
7628068	v'ch a1r		Sensory	CHO	A1	right	0	0	0	0	0	0	0	0	0	0	0	0	2	0	0	0	0	0	0	0	0	0	0	0	0	0
7209350	vch? sensory t2r (neuron 7209351)		Sensory	CHO	T2	right	0	0	0	0	1	0	0	0	0	0	0	0	0	0	0	0	0	0	0	0	0	0	0	0	0	0
7733871	vchAB_t3r		Sensory	CHO	T3	right	0	0	0	0	2	0	0	0	0	0	0	0	0	0	0	0	0	0	0	0	0	0	0	0	0	0
						SUM	0	0	0	0	10	6	220	123	42	66	41	69	9	17	0	0	0	0	0	0	0	1	0	0	0	0
16710165	C3da_a1r		Sensory	PROP	A1	right	0	0	0	0	0	0	0	0	0	0	0	0	0	0	0	0	0	1	0	0	0	0	0	0	0	0
6280151	ddaD_a1r (class I)		Sensory	PROP	A1	left	0	0	0	0	0	0	0	0	0	0	0	0	0	0	0	0	0	0	0	0	0	1	0	0	0	0
13671419	dbd_a1l		Sensory	PROP	A1	left	0	0	0	0	0	0	0	0	0	0	0	0	0	0	0	0	0	7	0	3	0	0	0	0	2	0
6195521	dbd_a1r		Sensory	PROP	A1	right	0	0	0	0	0	0	0	0	0	0	0	0	0	0	0	0	6	0	0	0	0	0	0	2	0	1
13883895	dbd_a2l		Sensory	PROP	A2	left	0	0	0	0	0	0	0	0	0	0	0	0	0	0	0	0	0	4	0	0	0	0	0	0	0	0
18162767	dbd_t2l		Sensory	PROP	T2	left	0	0	0	0	0	0	0	0	0	0	0	0	0	0	0	0	0	5	0	11	0	0	0	0	0	0
14913653	dbd_t2r		Sensory	PROP	T2	right	0	0	0	0	0	0	0	0	0	0	0	0	0	0	0	0	0	0	3	0	0	0	0	0	0	0
10562191	dbd_t3l		Sensory	PROP	T3	left	0	0	0	0	0	0	0	0	0	0	0	0	0	0	0	0	0	7	0	3	0	0	0	0	1	0
14573136	dbd_t3r		Sensory	PROP	T3	right	0	0	0	0	0	0	0	0	0	0	0	0	0	0	0	0	8	0	5	0	0	0	0	5	0	0
15505125	ddaE_t3l		Sensory	PROP	T3	left	0	0	0	0	0	0	0	0	0	0	0	0	0	0	0	0	3	0	0	0	0	0	0	0	0	0
16233066	ddaE_t3r		Sensory	PROP	T3	right	0	0	0	0	0	0	0	0	0	0	0	0	0	0	0	0	0	2	0	0	0	0	0	0	0	0
8419064	vbd_a1l_		Sensory	PROP	A1	left	0	0	0	0	0	0	0	0	0	0	0	0	0	0	0	0	1	0	9	4	8	0	0	1	0	0
14493979	vbd_a1r		Sensory	PROP	A1	right	0	0	0	0	0	0	0	0	0	0	0	0	0	0	0	0	0	0	2	6	0	3	0	0	0	0
14616276	vbd_a2l		Sensory	PROP	A2	left	0	0	0	0	0	0	0	0	0	0	0	0	0	0	0	0	0	0	2	1	0	0	0	0	0	0
6988210	vpda class md?_t2r		Sensory	PROP	T2	right	0	0	0	0	0	0	0	0	0	0	0	0	0	0	0	0	0	0	0	2	0	0	0	0	0	0
11578922	vpda classI md?_t3l		Sensory	PROP	T3	left	0	0	0	0	0	0	0	0	0	0	0	0	0	0	0	0	2	1	12	0	5	0	0	0	0	0
8234536	vpda classI md?_t3r		Sensory	PROP	T3	right	0	0	0	0	0	0	0	0	0	0	0	0	0	0	0	0	0	2	0	6	0	10	0	3	1	1
16232990	vpda_a1l (class I)		Sensory	PROP	A1	left	0	0	0	0	0	0	0	0	0	0	0	0	0	0	0	0	0	0	0	0	2	0	0	0	0	0
10515937	vpda_a1r (class I)		Sensory	PROP	A1	right	0	0	0	0	0	0	0	0	0	0	0	0	0	0	0	0	0	0	0	1	0	8	0	0	0	0
						SUM	0	0	0	0	0	0	0	0	0	0	0	0	0	0	0	0	20	29	33	37	15	22	0	11	4	2
6275686	ddaB? neuron 6275686_t3r		Sensory		T3	left	0	0	0	0	0	0	0	0	0	0	0	0	0	0	0	0	0	1	0	0	0	0	0	0	0	0
12960176	dmd1?_t3l		Sensory		T3	left	0	0	0	0	0	0	0	0	0	0	0	0	0	0	0	0	0	0	12	0	0	0	0	0	0	0
15401445	dmd1?_t3r		Sensory		T3	right	0	0	0	0	0	0	0	0	0	0	0	0	0	0	0	0	0	0	0	4	0	0	0	0	0	0
7753261	(dda E3 or dda A)_a1l_JMpair2		Sensory		A1	left	0	0	0	0	0	0	0	0	0	0	0	0	0	0	0	0	1	0	0	0	0	0	0	0	0	0
4629124	(not ch) sensory neuron_t3r_JMpair4		Sensory		T3	right	0	0	0	0	0	0	0	0	0	0	0	0	0	0	0	0	0	1	0	0	0	0	0	0	0	0
16455138	class III da sensory neuron_t3l		Sensory		T3	left	0	0	0	0	0	0	0	0	0	0	0	0	0	0	0	0	2	0	0	0	0	0	0	0	0	0
11306218	class III da? sensory neuron 11306219_t3l		Sensory		T3	left	0	0	0	0	0	0	0	0	0	0	0	0	0	0	0	0	3	0	0	0	0	0	0	0	0	0
16455030	class III da? sensory neuron 16455031_t3r		Sensory		T3	right	0	0	0	0	0	0	0	0	0	0	0	0	0	0	0	0	0	2	0	0	0	0	0	0	0	0
14894649	class III da?? sensory neuron_t3l		Sensory		T3	left	0	0	0	0	0	0	0	0	0	0	0	0	0	0	0	0	10	0	0	0	0	0	0	0	0	0
5228062	class III da?? sensory neuron_t3r		Sensory		T3	right	0	0	0	0	0	0	0	0	0	0	0	0	0	0	0	0	0	7	0	0	0	0	0	0	0	0
7758560	dda? sens_JMpair20_a1l		Sensory		A1	left	0	0	0	0	0	0	0	0	0	0	0	0	0	0	0	0	1	0	0	0	0	0	0	0	0	0
6271705	dda???_t3r		Sensory		T3	right	0	0	0	0	0	0	0	0	0	0	0	0	0	0	0	0	0	1	0	0	0	0	0	0	0	0
14894800	dda?sensory neuron _t3l		Sensory		T3	left	0	0	0	0	0	0	0	0	0	0	0	0	0	0	0	0	1	0	0	0	0	0	0	0	0	0
12469990	ddaB_a1l (class II)		Sensory		A1	right	0	0	0	0	0	0	0	0	0	0	0	0	0	0	0	0	4	0	0	0	2	0	0	0	0	0
10104463	ddaB_a1r (class II)		Sensory		T3	right	0	0	0	0	0	0	0	0	0	0	0	0	0	0	0	0	0	2	0	0	0	0	0	0	0	0
14966991	ddaE sensory neuron 14966992_a2l		Sensory				0	0	0	0	0	0	0	0	0	0	0	0	0	0	0	0	1	0	0	0	0	0	0	0	0	0
16322359	desD_a1r		Sensory		A1	right	0	0	0	0	0	0	0	0	0	0	0	0	0	0	0	0	0	1	0	0	0	0	0	0	0	0
12960079	dmd1_a1l_JMpair3		Sensory		T3	left	0	0	0	0	0	0	0	0	0	0	0	0	0	0	1	0	5	0	6	0	1	0	0	0	0	0
15551560	dmd1_a1r_JMpair3		Sensory		T3	right	0	0	0	0	0	0	0	0	0	0	0	0	0	0	0	0	0	19	0	1	0	0	0	0	0	0
7076835	ldaB a1r class III md		Sensory		A1	right	0	0	0	0	0	0	0	0	0	0	0	0	0	0	0	0	0	2	0	0	0	0	0	0	0	0
14642308	ldaB class III a1l		Sensory		A1	left	0	0	0	0	0	0	0	0	0	0	0	0	0	0	0	0	0	0	0	0	2	0	0	0	0	0
16312937	ldaB class III?_a1r too lateral_JMpair20		Sensory		A1	right	0	0	0	0	0	0	0	0	0	0	0	0	0	0	0	0	0	1	0	0	0	0	0	0	0	0
7772437	lesA_a1l		Sensory		A1	left	0	0	0	0	0	0	0	0	0	0	0	0	0	1	0	0	6	0	1	0	0	0	0	0	0	0
12140587	lesA_A1r		Sensory		A1	right	0	0	0	0	0	0	0	0	0	0	0	0	0	0	0	0	0	7	0	9	0	8	0	0	0	0
16313976	md III putative_a1r_JMpair19		Sensory		A1	right	0	0	0	0	0	0	0	0	0	0	0	0	0	0	0	0	0	1	0	0	0	0	0	0	0	0
7754674	not ddaA likely es_a1l		Sensory		A1	left	0	0	0	0	0	0	0	0	0	0	0	0	0	0	0	0	4	0	0	0	0	0	0	0	0	0
14639795	not ddaA likely es_a1r		Sensory		A1	right	0	0	0	0	0	0	0	0	0	0	0	0	0	0	0	0	0	17	0	0	0	1	0	0	0	0
5064892	sens		Sensory				0	0	0	0	0	1	0	0	0	0	0	0	0	0	0	0	0	0	0	0	0	0	0	0	0	0
2718786	sensory		Sensory				0	0	0	0	0	0	0	0	0	0	0	1	0	0	0	0	0	0	0	0	0	0	0	0	0	0
15647238	Sensory good neuron 15647239_t3l		Sensory				0	0	0	0	0	0	0	0	0	0	0	0	0	0	0	0	2	0	0	0	0	0	0	0	0	0
20861954	sensory neuron		Sensory				0	0	0	0	0	0	0	0	0	0	0	0	0	0	0	0	1	0	0	0	0	0	0	0	0	0
1040671	sensory neuron 1040672_a7l		Sensory		A7	left	0	0	0	0	0	0	0	0	0	0	0	1	0	0	0	0	0	0	0	0	0	0	0	0	0	0
14972063	sensory neuron 14972064_t3r		Sensory		T3	right	0	0	0	0	0	0	0	0	0	0	0	0	0	0	0	1	0	0	0	0	0	0	0	0	0	0
16454650	sensory neuron 16454651_a2r		Sensory		A2	right	0	0	0	0	0	0	0	0	0	0	0	0	0	0	0	0	0	2	0	0	0	0	0	0	0	0
20519461	sensory Neuron 20519462		Sensory				0	0	0	0	0	0	0	0	0	0	0	0	0	0	0	0	0	1	0	0	0	0	0	0	0	0
2415188	sensory neuron 2415189		Sensory				0	0	0	0	0	0	0	0	0	0	0	1	0	0	0	0	0	0	0	0	0	0	0	0	0	0
16233306	sensory X_JMpair2		Sensory				0	0	0	0	0	0	0	0	0	0	0	0	0	0	0	0	0	0	0	4	0	1	0	0	0	0
8939576	sensory_a3r		Sensory		A3	right	0	0	0	0	0	0	0	0	0	0	0	0	0	0	0	0	0	1	0	0	0	0	0	0	0	0
5584748	SN A1 left prob sensory_JMpair19		Sensory		A1	left	0	0	0	0	0	0	0	0	0	0	0	0	0	0	0	0	1	0	0	0	0	0	0	0	0	0
7783303	v'esA or v'esB or v'es2[1][2]_a1l (pair 3)		Sensory		A1	left	0	0	0	0	0	0	0	0	0	0	0	0	0	0	0	0	1	0	0	0	0	0	0	0	0	0
7783764	vdaC_a1l (class II)		Sensory		A1	left	0	0	0	0	0	0	0	0	0	0	0	0	0	0	0	0	0	0	1	0	1	0	0	0	0	0
10053734	vdaC_a1r (class II)		Sensory		A1	right	0	0	0	0	0	0	0	0	0	0	0	0	0	0	0	0	0	0	0	1	0	0	0	0	0	0
4464791	ves? sensory neuron t3l_JMpair2		Sensory		T3	left	0	0	0	0	0	0	0	0	0	0	0	0	0	0	0	0	0	0	5	0	0	0	0	0	0	0
16311532	vesC_a1l_		Sensory		A1	left	0	0	0	0	0	0	0	0	0	0	0	0	0	0	0	0	2	0	0	0	2	0	0	0	0	0
12529994	vesC_a1r		Sensory		A1	right	0	0	0	0	0	0	0	0	0	0	0	0	0	0	0	0	0	1	0	0	0	0	0	0	0	0
						SUM	0	0	0	0	0	1	0	0	0	0	0	3	0	1	1	1	45	67	25	19	8	10	0	0	0	0
