# Supplementary material for: Sequential addition of neuronal stem cell temporal cohorts generates a feed-forward circuit in the Drosophila larval nerve cord
Source: eLife. 2022 Jun 20;11:e79276. doi: 10.7554/eLife.79276 (PMC9333992; doi:10.7554/eLife.79276)
Supplement: Figure 4—source data 3. [file elife-79276-fig4-data3.xlsx]

## Sheet: Sheet1
number of synapses onto any NB3-3A1L/R neuron	number of interneurons
1	493
2	190
3	95
4	73
5	32
6	19
7	31
8	13
9	11
10 or more	11
