# Supplementary material for: Sequential addition of neuronal stem cell temporal cohorts generates a feed-forward circuit in the Drosophila larval nerve cord
Source: eLife. 2022 Jun 20;11:e79276. doi: 10.7554/eLife.79276 (PMC9333992; doi:10.7554/eLife.79276)
Supplement: Figure 4—source data 4. [file elife-79276-fig4-data4.xlsx]

## Sheet: Sheet1
skeleton ID	Newest Name							Sum	MN22/23 A1L	A08x A1L	A08j1 A1L	A08j3 A1L	A08j2 A1L	A08m A1L	A08o A1L	A08c A1L	A08s A1L	A08e3 A1L	A08e1 A1L	A08e2 A1L		MN22/23 a1r	A08x A1R	A08j1 A1R	A08j3 A1R	A08j2 A1R	A08m A1R	A08o A1R	A08c A1R	A08s A1R	A08e3 A1R	A08e1 A1R	A08e2 A1R
4936149	A01c1_a1r		interneuron		A1	right	ipsa/contra	21	21	0	0	0	0	0	0	0	0	0	0	0		0	0	0	0	0	0	0	0	0	0	0	0
17071666	A26f_a1r		interneuron		A1	right	bi/contra	20	20	0	0	0	0	0	0	0	0	0	0	0		0	0	0	0	0	0	0	0	0	0	0	0
4978454	A19l_a1r		interneuron		A1	right	ipsa/contra	19	19	0	0	0	0	0	0	0	0	0	0	0		0	0	0	0	0	0	0	0	0	0	0	0
16690920	A18j_a1r		interneuron		A2	left	ipsa/contra	26	18	0	0	0	0	0	0	0	0	0	0	0		8	0	0	0	0	0	0	0	0	0	0	0
18520222	A26f_a2r		interneuron		A2	right	bi/contra	18	18	0	0	0	0	0	0	0	0	0	0	0		0	0	0	0	0	0	0	0	0	0	0	0
10185585	T01d1_t3r		interneuron		T3	right	ipsa/contra	16	16	0	0	0	0	0	0	0	0	0	0	0		0	0	0	0	0	0	0	0	0	0	0	0
4038808	A27k_a2l		interneuron		A2	left	ipsa/ipsa	16	12	0	0	0	0	0	0	0	4	0	0	0		0	0	0	0	0	0	0	0	0	0	0	0
12468812	A09l_a1l (Down-and-back-1)		interneuron		A1	left	ipsa/ipsa	12	12	0	0	0	0	0	0	0	0	0	0	0		0	0	0	0	0	0	0	0	0	0	0	0
4071032	A02f_a1l		interneuron		A1	left	ipsa/ipsa	9	9	0	0	0	0	0	0	0	0	0	0	0		0	0	0	0	0	0	0	0	0	0	0	0
5309932	A03g_a1l		interneuron		A1	left	ipsa/ipsa	9	9	0	0	0	0	0	0	0	0	0	0	0		0	0	0	0	0	0	0	0	0	0	0	0
16226512	A01c2_a1r (ipsi_dendrite)		interneuron		A1	right	ipsa/contra	8	7	0	0	0	0	0	0	0	0	0	0	0		1	0	0	0	0	0	0	0	0	0	0	0
2798040	A02i_a1l		interneuron		A1	left	ipsa/ipsa	7	7	0	0	0	0	0	0	0	0	0	0	0		0	0	0	0	0	0	0	0	0	0	0	0
5298032	A14a_a1r		interneuron		A1	right	ipsa/contra	7	7	0	0	0	0	0	0	0	0	0	0	0		0	0	0	0	0	0	0	0	0	0	0	0
3673274	A18j_a2r		interneuron					7	7	0	0	0	0	0	0	0	0	0	0	0		0	0	0	0	0	0	0	0	0	0	0	0
4584506	T01d2_t3r		interneuron		T3	right	ipsa/contra	7	7	0	0	0	0	0	0	0	0	0	0	0		0	0	0	0	0	0	0	0	0	0	0	0
4731383	A01d3_t3r (T01d3)		interneuron		T3	right	contra/contra	12	5	0	0	0	0	0	0	0	3	4	0	0		0	0	0	0	0	0	0	0	0	0	0	0
5078760	A18j_a1l		interneuron		A1	right	ipsa/contra	25	5	0	0	0	0	0	0	0	1	0	0	0		19	0	0	0	0	0	0	0	0	0	0	0
1711076	A26f_a3r		interneuron		A3	right	bi/contra	5	5	0	0	0	0	0	0	0	0	0	0	0		0	0	0	0	0	0	0	0	0	0	0	0
10090269	A27e(2)_a1l		interneuron		A1	left	ipsa/ipsa	5	5	0	0	0	0	0	0	0	0	0	0	0		0	0	0	0	0	0	0	0	0	0	0	0
4038469	A01x_a1r		interneuron		A1	left	contra/contra	5	4	0	0	0	0	0	0	0	1	0	0	0		0	0	0	0	0	0	0	0	0	0	0	0
4039711	A03xyz_a1l		interneuron		A1	left	ipsa/ipsa	10	2	0	0	3	0	0	0	0	0	0	0	0		0	0	0	1	4	0	0	0	0	0	0	0
4213417	A27k_a1l		interneuron		A1	left	ipsa/ipsa	3	2	0	0	0	0	0	0	0	1	0	0	0		0	0	0	0	0	0	0	0	0	0	0	0
16326658	A02i_a2l		interneuron		A2	left	ipsa/ipsa	2	2	0	0	0	0	0	0	0	0	0	0	0		0	0	0	0	0	0	0	0	0	0	0	0
7934159	A27n_a1l		interneuron		A1	left	ipsa/ipsa	2	2	0	0	0	0	0	0	0	0	0	0	0		0	0	0	0	0	0	0	0	0	0	0	0
10058316	A27neo_a1l		interneuron		A1	left	bi/ipsa	2	2	0	0	0	0	0	0	0	0	0	0	0		0	0	0	0	0	0	0	0	0	0	0	0
12036009	A06f_a1r (Saaghi-2)		interneuron		A1	right	ipsa/contra	1	1	0	0	0	0	0	0	0	0	0	0	0		0	0	0	0	0	0	0	0	0	0	0	0
4780637	A18j_a2l		interneuron		A2	right	ipsa/contra	6	1	0	0	0	0	0	0	0	0	0	0	0		5	0	0	0	0	0	0	0	0	0	0	0
20306340	Ladder_t3r mid_descending		interneuron	ladder	T3	MNB	bi/bi	49	0	10	0	19	2	0	0	0	0	0	0	0		0	2	0	16	0	0	0	0	0	0	0	0
3282869	A09b a1r Basin-1		interneuron	Basin	A1	right	ipsa/ipsa	21	0	9	0	0	0	7	0	0	0	0	0	0		0	4	0	0	0	0	0	1	0	0	0	0
4598201	A09a Basin-2 t3r		interneuron	Basin	T3	right	ipsa/ipsa	12	0	9	0	0	0	2	0	0	0	0	0	0		0	1	0	0	0	0	0	0	0	0	0	0
6121546	Pre-goro1_relative_t1r		interneuron		T1	right		14	0	8	0	0	0	2	0	0	0	0	0	0		0	4	0	0	0	0	0	0	0	0	0	0
7185469	A08v_t2l		interneuron	early EL	A4	left	contra/contra	15	0	8	0	0	0	0	0	0	0	0	0	0		0	7	0	0	0	0	0	0	0	0	0	0
2986525	T06o t2l		interneuron		T2	left	bi/bi	18	0	6	0	3	1	0	0	0	0	0	0	0		0	3	0	5	0	0	0	0	0	0	0	0
5432060	basin-related descending 2 sog_l			SEZ	SEZ	left	bi/contra	8	0	6	0	0	0	0	0	0	0	0	0	0		0	2	0	0	0	0	0	0	0	0	0	0
20438424	A08v_a3l		interneuron	early EL	T2	left	contra/contra	8	0	5	0	0	3	0	0	0	0	0	0	0		0	0	0	0	0	0	0	0	0	0	0	0
1016662	basin-related descending 2 sog_r			SEZ	SEZ	right	bi/contra	7	0	5	0	0	0	1	0	0	0	0	0	0		0	1	0	0	0	0	0	0	0	0	0	0
1657277	A12h_a4l		interneuron		A4	left		40	0	4	0	20	0	1	0	0	0	0	0	0		0	1	0	14	0	0	0	0	0	0	0	0
7585631	Ladder(2)_t2		interneuron	ladder	T2	MNB	bi/bi	29	0	4	0	13	3	0	0	0	0	0	0	0		0	0	0	8	1	0	0	0	0	0	0	0
3029998	A08v?_a4l		interneuron	early EL	A3	left	contra/contra	4	0	4	0	0	0	0	0	0	0	0	0	0		0	0	0	0	0	0	0	0	0	0	0	0
2975298	T06o t2r		interneuron		T2	right	bi/bi	14	0	3	1	3	3	0	0	0	0	0	0	0		0	4	0	0	0	0	0	0	0	0	0	0
4942150	Ladder_t1u		interneuron	ladder	T1	MNB	bi/bi	16	0	3	0	2	5	0	0	0	0	0	0	0		0	0	0	2	4	0	0	0	0	0	0	0
8614658	Ladder-a_t3l		interneuron	ladder	T3	MNB	bi/bi	16	0	3	0	2	4	0	0	0	0	0	0	0		0	2	0	3	1	1	0	0	0	0	0	0
17294442	Ladder(3)_t2		interneuron	ladder	T2	MNB	bi/bi	15	0	3	0	2	4	0	0	0	0	0	0	0		0	4	0	0	2	0	0	0	0	0	0	0
3278999	A09b Basin-1 a2r		interneuron	Basin	A2	right	ipsa/ipsa	6	0	3	0	0	0	2	0	0	0	0	0	0		0	1	0	0	0	0	0	0	0	0	0	0
16330265	A19x a1r		interneuron		A1	right	ipsa/contra	3	0	2	0	1	0	0	0	0	0	0	0	0		0	0	0	0	0	0	0	0	0	0	0	0
16278312	A09 Contra Brain Projection_a1r		interneuron		A1	left	projection to Br	5	0	2	0	0	1	0	0	0	0	0	0	0		0	2	0	0	0	0	0	0	0	0	0	0
5182902	A09c_t3r Basin-4?		interneuron	Basin	T3	right	ipsa/ipsa	6	0	2	0	0	0	4	0	0	0	0	0	0		0	0	0	0	0	0	0	0	0	0	0	0
3220616	A09 Contra Brain Projection_a1l		interneuron		A1	right	projection to Br	3	0	2	0	0	0	0	0	0	0	0	0	0		0	1	0	0	0	0	0	0	0	0	0	0
3279737	A09c Basin-4 a2r		interneuron	Basin	A2	right	ipsa/ipsa	4	0	2	0	0	0	0	0	0	0	0	0	0		0	2	0	0	0	0	0	0	0	0	0	0
4384461	A19x? a3l		interneuron		A3	left	ipsa/contra	4	0	2	0	0	0	0	0	0	0	0	0	0		0	1	0	0	0	1	0	0	0	0	0	0
6821326	Pre-goro1_relative_t1l		interneuron		T1	left		10	0	2	0	0	0	0	0	0	0	0	0	0		0	6	0	0	0	2	0	0	0	0	0	0
471705	Ladder-d_a1		interneuron	ladder	A1	MNB	bi/bi	23	0	1	12	0	3	0	0	0	0	0	0	0		0	0	3	3	1	0	0	0	0	0	0	0
8577316	Ladder-f a1		interneuron	ladder	A1	MNB	bi/bi	28	0	1	0	8	3	0	0	0	0	0	0	0		0	2	0	12	2	0	0	0	0	0	0	0
1452290	A12h_a4r		interneuron		A4	right		40	0	1	0	7	1	0	0	0	0	0	0	0		0	3	0	26	2	0	0	0	0	0	0	0
10763004	T2 bilateral PN T2r		interneuron		T2	right		8	0	1	0	2	0	0	0	0	0	0	0	0		0	1	0	2	2	0	0	0	0	0	0	0
7184082	A08x_a1r		interneuron	early EL	A1	right		6	0	1	0	1	0	3	0	0	0	0	0	0		0	0	0	0	1	0	0	0	0	0	0	0
6246099	A08v_a3r		interneuron	early EL	T2	right	contra/contra	4	0	1	0	0	1	0	0	0	0	0	0	0		0	0	0	0	2	0	0	0	0	0	0	0
7478138	A12l_a3l		interneuron		A3	left	bi/contra	4	0	1	0	0	1	0	0	0	0	0	0	0		0	0	2	0	0	0	0	0	0	0	0	0
11455472	VLEL9_a1l		interneuron	early EL	A1	left	bi/contra	4	0	1	0	0	1	0	0	0	0	0	0	0		0	0	0	2	0	0	0	0	0	0	0	0
3425777	A09a Basin-2 t3l		interneuron	Basin	T3	left	ipsa/ipsa	12	0	1	0	0	0	0	0	0	0	0	0	0		0	5	0	0	0	6	0	0	0	0	0	0
3034133	A09b a1l Basin-1		interneuron	Basin	A1	left	ipsa/ipsa	18	0	1	0	0	0	0	0	0	0	0	0	0		0	10	0	0	0	7	0	0	0	0	0	0
3043553	A09b Basin-1 a2l		interneuron	Basin	A2	left	ipsa/ipsa	15	0	1	0	0	0	0	0	0	0	0	0	0		0	7	0	0	0	7	0	0	0	0	0	0
10054666	A19x a1l		interneuron		A1	left	ipsa/contra	4	0	1	0	0	0	0	0	0	0	0	0	0		0	1	0	0	1	1	0	0	0	0	0	0
4595569	Ladder_(neuron 4595570)_a3		interneuron	ladder	A3	MNB	bi/bi	28	0	0	13	1	5	0	0	0	0	0	0	0		0	0	6	0	3	0	0	0	0	0	0	0
788359	Ladder-d_a4		interneuron	ladder	A4	MNB	bi/bi	11	0	0	10	0	0	0	0	0	0	0	0	0		0	0	1	0	0	0	0	0	0	0	0	0
4913256	Ladder_(pre-lch5-3 axon)_a3		interneuron	ladder	A3	MNB	bi/bi	55	0	0	6	14	0	0	0	0	0	0	0	0		0	0	17	16	2	0	0	0	0	0	0	0
2123422	hook-1_a1l		interneuron		A1	left	ipsa/ipsa	11	0	0	6	0	2	0	0	0	0	0	0	0		0	0	2	1	0	0	0	0	0	0	0	0
2784471	hook-1_a1r		interneuron		A1	right	ipsa/ipsa	8	0	0	4	1	1	0	0	0	0	0	0	0		0	0	2	0	0	0	0	0	0	0	0	0
2667974	Ladder_(post lch5-2/4)_a3		interneuron	ladder	A3	MNB	bi/bi	11	0	0	2	0	4	0	0	0	0	0	0	0		0	0	1	1	3	0	0	0	0	0	0	0
10929797	VLEL4_a1l		interneuron	early EL	A1	left	bi/contra	35	0	0	1	9	1	0	2	0	0	0	0	0		0	0	7	14	1	0	0	0	0	0	0	0
8198913	VLEL4_a1r		interneuron	early EL	A1	right	bi/contra	24	0	0	1	3	2	0	0	0	0	0	0	0		0	2	1	13	2	0	0	0	0	0	0	0
16609090	T2 bilateral PN T2l		interneuron		T2	left		2	0	0	1	1	0	0	0	0	0	0	0	0		0	0	0	0	0	0	0	0	0	0	0	0
8257672	VLEL9_a1r		interneuron	early EL	A1	right	bi/contra	2	0	0	1	0	0	0	0	0	0	0	0	0		0	0	0	0	1	0	0	0	0	0	0	0
14535	Ladder_t1 with post T at 1637 (thoracic)		interneuron	ladder	T2	MNB	bi/bi	17	0	0	0	8	3	0	0	0	0	0	0	0		0	1	0	4	1	0	0	0	0	0	0	0
19310779	A08j2_a2r		interneuron	early EL	A2	right	contra/contra	25	0	0	0	7	11	0	0	0	0	0	0	0		0	0	1	5	1	0	0	0	0	0	0	0
10949030	A08j2_a1r		interneuron	early EL	A1	right		13	0	0	0	7	1	0	0	0	0	0	0	0		0	2	0	2	1	0	0	0	0	0	0	0
8057753	A08j2_a1l		interneuron	early EL	A1	left		14	0	0	0	5	2	0	0	0	0	0	0	0		0	0	1	3	3	0	0	0	0	0	0	0
7657358	Ladder-f a2		interneuron	ladder	A2	MNB	bi/bi	15	0	0	0	4	2	0	0	0	0	0	0	0		0	0	0	5	4	0	0	0	0	0	0	0
2664230	Jupiter A08h2 a3l		interneuron		A3	left	bi/contra	5	0	0	0	4	1	0	0	0	0	0	0	0		0	0	0	0	0	0	0	0	0	0	0	0
10937355	H-shaped_a1r		interneuron		A1	right	bi/contra	6	0	0	0	4	0	0	0	0	0	0	0	0		0	1	0	1	0	0	0	0	0	0	0	0
1699916	likely A09h		interneuron		A3	left	ipsa/ipsa	5	0	0	0	3	0	0	0	0	0	0	0	0		0	0	0	2	0	0	0	0	0	0	0	0
11024782	A08h2_a2l (Jupiter left, not NB3-3)		interneuron		A2	left	ipsa/contra	6	0	0	0	2	3	0	0	0	0	0	0	0		0	0	0	1	0	0	0	0	0	0	0	0
8602741	A08j2_a2l		interneuron	early EL	A2	left	contra/contra	7	0	0	0	2	2	0	0	0	0	0	0	0		0	0	0	1	2	0	0	0	0	0	0	0
9354613	A10j_a3l		interneuron		A4	right	contra/contra	8	0	0	0	2	1	4	0	0	0	0	0	0		0	0	0	1	0	0	0	0	0	0	0	0
5343578	A08x_a1l		interneuron	early EL	A1	left		6	0	0	0	2	0	2	0	0	0	0	0	0		0	0	0	2	0	0	0	0	0	0	0	0
4302562	A03o_a1l		interneuron		A1	left	ipsa/ipsa	8	0	0	0	2	0	0	0	0	0	0	0	0		0	1	0	0	1	4	0	0	0	0	0	0
7766016	H-shaped _a1l		interneuron		A1	left	bi/contra	5	0	0	0	2	0	0	0	0	0	0	0	0		0	0	0	3	0	0	0	0	0	0	0	0
7169767	telson PN to brain_a7l		interneuron		A7	left	ipsa/contra	5	0	0	0	2	0	0	0	0	0	0	0	0		0	0	2	1	0	0	0	0	0	0	0	0
2647140	telson PN to brain_a7r		interneuron		A7	right	bi/contra	8	0	0	0	2	0	0	0	0	0	0	0	0		0	0	1	4	1	0	0	0	0	0	0	0
7533574	A12l_a3r putative		interneuron		A3	right	bi/contra	7	0	0	0	1	5	0	0	0	0	0	0	0		0	0	0	0	1	0	0	0	0	0	0	0
4321712	Handle-B a1		interneuron		A1	MNB	bi/bi	8	0	0	0	1	0	0	0	4	0	0	0	0		0	1	0	0	0	0	0	2	0	0	0	0
4228864	A08h2_a2r (Jupiter right, not NB3-3)		interneuron		A2	right	ipsa/contra	9	0	0	0	1	0	0	0	0	0	0	0	0		0	0	0	4	4	0	0	0	0	0	0	0
7827759	A08v?_a4r		interneuron	early EL	A3	right	contra/contra	5	0	0	0	1	0	0	0	0	0	0	0	0		0	2	0	0	1	0	1	0	0	0	0	0
7150847	likely A09h		interneuron	fragment		left	ipsa/ipsa	3	0	0	0	1	0	0	0	0	0	0	0	0		0	0	0	1	0	0	1	0	0	0	0	0
7606070	Ladder-e a2		interneuron	ladder	A2	MNB	bi/bi	10	0	0	0	0	4	0	0	0	0	0	0	0		0	0	1	1	4	0	0	0	0	0	0	0
8551220	A19x a3r		interneuron		A3	right	ipsa/contra	5	0	0	0	0	3	0	0	0	0	0	0	0		0	0	0	1	1	0	0	0	0	0	0	0
4380751	A10j_a4r		interneuron		T3	right	ipsa/contra	5	0	0	0	0	1	0	0	0	0	0	0	0		0	0	0	0	0	4	0	0	0	0	0	0
5268581	basin-related descending 1 sog_l			SEZ	SEZ	left	bi/contra	9	0	0	0	0	0	9	0	0	0	0	0	0		0	0	0	0	0	0	0	0	0	0	0	0
16042066	A03 (upstream of A08m)_a1r		interneuron		A1	right	ipsa/ipsa	8	0	0	0	0	0	8	0	0	0	0	0	0		0	0	0	0	0	0	0	0	0	0	0	0
3180525	A03o_a1r		interneuron		A1	right	ipsa/ipsa	7	0	0	0	0	0	7	0	0	0	0	0	0		0	0	0	0	0	0	0	0	0	0	0	0
17429419	A10j_a4l		interneuron		A5	left	contra/contra	6	0	0	0	0	0	6	0	0	0	0	0	0		0	0	0	0	0	0	0	0	0	0	0	0
4538613	A03xyz_a1r		interneuron		A1	right	ipsa/ipsa	3	0	0	0	0	0	3	0	0	0	0	0	0		0	0	0	0	0	0	0	0	0	0	0	0
16490572	A10? neuron 16490572_a1l		interneuron		A1	left	contra/contra	3	0	0	0	0	0	3	0	0	0	0	0	0		0	0	0	0	0	0	0	0	0	0	0	0
3091943	A09g a1r Basin-3		interneuron	Basin	A1	right	ipsa/ipsa	2	0	0	0	0	0	2	0	0	0	0	0	0		0	0	0	0	0	0	0	0	0	0	0	0
12874044	JaamXX A12f_a1l		interneuron		A1	left	bi/contra	5	0	0	0	0	0	1	0	0	0	1	1	0		2	0	0	0	0	0	0	0	0	0	0	0
16337850	A07d_a1l		interneuron		T3	left		12	0	0	0	0	0	1	0	0	0	0	0	0		0	0	0	0	0	0	0	0	0	0	11	0
16232415	A26d_t3l_JMpair26		interneuron		T3	left	bi/bi	5	0	0	0	0	0	1	0	0	0	0	0	0		0	0	0	0	0	0	2	2	0	0	0	0
5336476	A19c_a1r		interneuron		A1	right	ipsa/contra	14	0	0	0	0	0	0	9	0	0	0	5	0		0	0	0	0	0	0	0	0	0	0	0	0
16698043	Pre-goro12_t3r (neuron 16698044)		interneuron		T3	right		9	0	0	0	0	0	0	9	0	0	0	0	0		0	0	0	0	0	0	0	0	0	0	0	0
8915193	Pre A08/goro neuron 8915194_a8r		interneuron					13	0	0	0	0	0	0	8	5	0	0	0	0		0	0	0	0	0	0	0	0	0	0	0	0
7977567	A6r neuron		interneuron		A6	right	ipsa/contra	13	0	0	0	0	0	0	7	0	0	0	6	0		0	0	0	0	0	0	0	0	0	0	0	0
10158985	A08h4b_a2r		interneuron	late EL	A2	right	contra/contra	9	0	0	0	0	0	0	6	3	0	0	0	0		0	0	0	0	0	0	0	0	0	0	0	0
16167137	pre-A08o_t3r		interneuron		T3	right		6	0	0	0	0	0	0	6	0	0	0	0	0		0	0	0	0	0	0	0	0	0	0	0	0
14802547	A23f1b_a (=Pre-goro 10)_a1r		interneuron		A1	right	ipsa/contra	6	0	0	0	0	0	0	4	2	0	0	0	0		0	0	0	0	0	0	0	0	0	0	0	0
7230545	A23f1b (= Pre-goro10)_a1r		interneuron		A1	right	ipsa/contra	5	0	0	0	0	0	0	4	1	0	0	0	0		0	0	0	0	0	0	0	0	0	0	0	0
7977599	A6r neuron twin with error		interneuron		no CB	left		8	0	0	0	0	0	0	4	0	0	0	4	0		0	0	0	0	0	0	0	0	0	0	0	0
6755064	A08m_a1r		interneuron	early EL	A1	right		4	0	0	0	0	0	0	4	0	0	0	0	0		0	0	0	0	0	0	0	0	0	0	0	0
13474177	A14d_t3r		interneuron		T3	right		8	0	0	0	0	0	0	1	0	7	0	0	0		0	0	0	0	0	0	0	0	0	0	0	0
4060628	A08m_a1l		interneuron	early EL	A1	left		2	0	0	0	0	0	0	1	0	0	0	0	0		0	0	0	0	0	0	1	0	0	0	0	0
13004884	A02a- looper-1_a1l		interneuron		A2	left	ipsa/ipsa	14	0	0	0	0	0	0	0	14	0	0	0	0		0	0	0	0	0	0	0	0	0	0	0	0
15697776	A10_a4r (neuron 15697777_CCWpair)		interneuron		A1	right	ipsa/contra	12	0	0	0	0	0	0	0	12	0	0	0	0		0	0	0	0	0	0	0	0	0	0	0	0
21173919	A02a_a2l looper-1		interneuron		A1	left	ipsa/ipsa	5	0	0	0	0	0	0	0	5	0	0	0	0		0	0	0	0	0	0	0	0	0	0	0	0
15352877	A26d_t3r_JMpair26		interneuron		T3	right	bi/bi	4	0	0	0	0	0	0	0	3	0	0	0	0		0	0	0	0	0	1	0	0	0	0	0	0
16531827	A03 (upstream of A08m)_a1l		interneuron		A1	left	ipsa/ipsa	11	0	0	0	0	0	0	0	1	0	0	0	0		0	0	4	0	0	6	0	0	0	0	0	0
12990250	Jaam-2_a1r (HMD2 (A12g))		interneuron		A1	right	bi/contra	7	0	0	0	0	0	0	0	0	7	0	0	0		0	0	0	0	0	0	0	0	0	0	0	0
15264419	A06m_a1r		interneuron		A1	right	ipsa/contra	6	0	0	0	0	0	0	0	0	6	0	0	0		0	0	0	0	0	0	0	0	0	0	0	0
11986955	A10_ipsaLP_t2l		interneuron		T2	left		5	0	0	0	0	0	0	0	0	5	0	0	0		0	0	0	0	0	0	0	0	0	0	0	0
11064947	A01bx_a1r		interneuron		A1	right	ipsa/contra	15	0	0	0	0	0	0	0	0	4	10	0	0		0	0	0	0	0	0	0	0	0	0	1	0
16114537	A06(not to brain)a_t3l		interneuron		T3	left	ipsa/contra	3	0	0	0	0	0	0	0	0	3	0	0	0		0	0	0	0	0	0	0	0	0	0	0	0
11928389	Jaam-3_a1l (HMD3 (A12 c3))		interneuron		A1	left	bi/contra	21	0	0	0	0	0	0	0	0	2	0	0	0		0	0	0	0	0	0	0	0	0	0	18	1
15504369	A27j2_a1l_GABA		interneuron		A1	left	ipsa/ipsa	13	0	0	0	0	0	0	0	0	1	12	0	0		0	0	0	0	0	0	0	0	0	0	0	0
13775274	Jaam-3_a1r (HMD3 (A12 c3))		interneuron		A1	right	bi/contra	22	0	0	0	0	0	0	0	0	1	0	14	0		0	0	0	0	0	0	0	0	7	0	0	0
11940330	A18ant_a3r		interneuron		A3	right		4	0	0	0	0	0	0	0	0	1	0	0	3		0	0	0	0	0	0	0	0	0	0	0	0
16240665	A03xKT_a1l		interneuron		T3	left	ipsa/ipsa	4	0	0	0	0	0	0	0	0	0	4	0	0		0	0	0	0	0	0	0	0	0	0	0	0
10017183	A07d_a1r		interneuron		T3	right		8	0	0	0	0	0	0	0	0	0	0	8	0		0	0	0	0	0	0	0	0	0	0	0	0
16168234	A07d2_t3r		interneuron		A1	right		4	0	0	0	0	0	0	0	0	0	0	4	0		0	0	0	0	0	0	0	0	0	0	0	0
7980225	A07d_t3r		interneuron		T3	right		3	0	0	0	0	0	0	0	0	0	0	3	0		0	0	0	0	0	0	0	0	0	0	0	0
18466196	A07d3_t3r		interneuron		T3	right		3	0	0	0	0	0	0	0	0	0	0	3	0		0	0	0	0	0	0	0	0	0	0	0	0
17077347	JaamXX A12f_a1r		interneuron		A1	right	bi/contra	2	0	0	0	0	0	0	0	0	0	0	1	1		0	0	0	0	0	0	0	0	0	0	0	0
8095561	Jaam-1_a1r (HMD1 (A12p))		interneuron		A1	right	bi/contra	9	0	0	0	0	0	0	0	0	0	0	0	9		0	0	0	0	0	0	0	0	0	0	0	0
11057449	A06 (pre B5 01)_a1r		interneuron		A1	right	ipsa/contra	4	0	0	0	0	0	0	0	0	0	0	0	4		0	0	0	0	0	0	0	0	0	0	0	0
15878735	A08(X16)_a2r		interneuron	late EL	A2	right	ipsa/contra	5	0	0	0	0	0	0	0	0	0	0	0	4		0	0	0	0	0	0	0	1	0	0	0	0
11072929	A18g_a2r		interneuron		A3	left	ipsa/contra	4	0	0	0	0	0	0	0	0	0	0	0	4		0	0	0	0	0	0	0	0	0	0	0	0
16504350	A01bx_a1l		interneuron		A1	left	ipsa/contra	20	0	0	0	0	0	0	0	0	0	0	0	0		0	0	0	0	0	0	1	0	9	7	0	3
4113533	A01c1_a1l		interneuron		A1	left	ipsa/contra	28	0	0	0	0	0	0	0	0	0	0	0	0		28	0	0	0	0	0	0	0	0	0	0	0
5084467	A01c2_a1l (ipsi_dendrite)		interneuron		A1	left	ipsa/contra	19	0	0	0	0	0	0	0	0	0	0	0	0		19	0	0	0	0	0	0	0	0	0	0	0
14826752	A01d3_t3l (T01d3)		interneuron		T3	left	contra/contra	4	0	0	0	0	0	0	0	0	0	0	0	0		4	0	0	0	0	0	0	0	0	0	0	0
4123145	A01x_a1l		interneuron		A1	right	bi/contra	3	0	0	0	0	0	0	0	0	0	0	0	0		3	0	0	0	0	0	0	0	0	0	0	0
15883343	A02a_a2r looper-1		interneuron		A1	right	ipsa/ipsa	6	0	0	0	0	0	0	0	0	0	0	0	0		0	0	0	0	0	0	0	6	0	0	0	0
15199830	A02a- looper-1_a1r		interneuron		A2	right	ipsa/ipsa	17	0	0	0	0	0	0	0	0	0	0	0	0		0	0	0	0	0	0	0	17	0	0	0	0
12953345	A02f_a1r		interneuron		A1	right	ipsa/ipsa	3	0	0	0	0	0	0	0	0	0	0	0	0		3	0	0	0	0	0	0	0	0	0	0	0
10855206	A03g_a1r		interneuron		A1	right	ipsa/ipsa	10	0	0	0	0	0	0	0	0	0	0	0	0		10	0	0	0	0	0	0	0	0	0	0	0
15290305	A03xKT_a1r		interneuron		T3	right	ipsa/ipsa	5	0	0	0	0	0	0	0	0	0	0	0	0		0	0	0	0	0	0	0	0	0	5	0	0
18509063	A06 (pre B5 01)_a1l		interneuron		A1	left	ipsa/contra	5	0	0	0	0	0	0	0	0	0	0	0	0		0	0	0	0	0	0	0	0	0	0	0	5
13037149	A06(not to brain)a_t3r		interneuron		T3	right		4	0	0	0	0	0	0	0	0	0	0	0	0		0	0	0	0	0	0	0	0	4	0	0	0
4386719	A06f_a1l (Saaghi-2)		interneuron		A1	left	ipsa/contra	2	0	0	0	0	0	0	0	0	0	0	0	0		2	0	0	0	0	0	0	0	0	0	0	0
8235049	A06m_a1l		interneuron		A1	left	ipsa/contra	7	0	0	0	0	0	0	0	0	0	0	0	0		0	0	0	0	0	0	0	0	4	0	0	3
11927029	A07d_t3l		interneuron		T3	left		7	0	0	0	0	0	0	0	0	0	0	0	0		0	0	0	0	0	0	0	0	0	0	7	0
11926982	A07d2_t3l		interneuron		A1	left		8	0	0	0	0	0	0	0	0	0	0	0	0		0	0	0	0	0	0	0	0	0	0	8	0
15545077	A07d3_t3l		interneuron		T3	left		5	0	0	0	0	0	0	0	0	0	0	0	0		0	0	0	0	0	0	0	0	0	0	5	0
14930754	A08(X16)_a2l		interneuron	late EL	A2	left	ipsa/contra	6	0	0	0	0	0	0	0	0	0	0	0	0		0	0	0	0	0	0	0	0	0	0	0	6
4628271	A08h4b_a2l		interneuron	late EL	A2	left	contra/contra	13	0	0	0	0	0	0	0	0	0	0	0	0		0	0	0	1	0	0	6	6	0	0	0	0
6202481	A08v_t2r		interneuron	early EL	A4	right	contra/contra	22	0	0	0	0	0	0	0	0	0	0	0	0		0	22	0	0	0	0	0	0	0	0	0	0
3065790	A09c Basin-4 a2l		interneuron	Basin	A2	left	ipsa/ipsa	2	0	0	0	0	0	0	0	0	0	0	0	0		0	0	0	0	0	2	0	0	0	0	0	0
3426634	A09c_t3l Basin-4?		interneuron	Basin	T3	left	ipsa/ipsa	2	0	0	0	0	0	0	0	0	0	0	0	0		0	0	0	0	0	2	0	0	0	0	0	0
10179501	A09g a1l Basin-3		interneuron	Basin	A1	left	ipsa/ipsa	4	0	0	0	0	0	0	0	0	0	0	0	0		0	0	0	0	0	4	0	0	0	0	0	0
4102844	A09l_a1r (Down-and-back-1)		interneuron		A1	right	ipsa/ipsa	8	0	0	0	0	0	0	0	0	0	0	0	0		3	0	0	0	0	0	0	0	3	2	0	0
20372111	A10_a4l (neuron 20372112_CCWpair)		interneuron		A1	left	ipsa/contra	16	0	0	0	0	0	0	0	0	0	0	0	0		0	0	0	0	0	0	0	16	0	0	0	0
8027831	A10_ipsaLP_t2r		interneuron		T2	right		15	0	0	0	0	0	0	0	0	0	0	0	0		0	0	0	0	0	0	0	0	15	0	0	0
9791965	A10? a1r		interneuron		A1	right		4	0	0	0	0	0	0	0	0	0	0	0	0		0	0	0	0	0	4	0	0	0	0	0	0
4163234	A10j_a3r		interneuron		A2	right	contra/contra	10	0	0	0	0	0	0	0	0	0	0	0	0		0	0	0	0	0	10	0	0	0	0	0	0
12820277	A14a_a1l		interneuron		A1	left	ipsa/contra	4	0	0	0	0	0	0	0	0	0	0	0	0		4	0	0	0	0	0	0	0	0	0	0	0
21139414	A14d_t3l		interneuron		T3	left		7	0	0	0	0	0	0	0	0	0	0	0	0		0	0	0	0	0	0	0	0	7	0	0	0
11509166	A18ant_a3l		interneuron		A3	left		9	0	0	0	0	0	0	0	0	0	0	0	0		0	0	0	0	0	0	0	0	1	0	0	8
15930348	A18g_a2l		interneuron		A2	right	ipsa/contra	3	0	0	0	0	0	0	0	0	0	0	0	0		0	0	0	0	0	0	0	0	0	0	0	3
4081479	A19c_a1l		interneuron		A1	left	ipsa/contra	9	0	0	0	0	0	0	0	0	0	0	0	0		0	0	0	0	0	0	5	0	0	0	4	0
5358138	A19l_a1l		interneuron		A1	left	ipsa/contra	13	0	0	0	0	0	0	0	0	0	0	0	0		13	0	0	0	0	0	0	0	0	0	0	0
14523353	A23f1b (= Pre-goro10)_a1l		interneuron		A1	left	ipsa/contra	4	0	0	0	0	0	0	0	0	0	0	0	0		0	0	0	0	0	0	4	0	0	0	0	0
14544854	A23f1b_a (= Pre-goro10)_a1l		interneuron		A1	left	ipsa/contra	13	0	0	0	0	0	0	0	0	0	0	0	0		0	0	0	0	0	0	8	4	1	0	0	0
13258642	A26f_a1l		interneuron		A1	left	bi/contra	18	0	0	0	0	0	0	0	0	0	0	0	0		18	0	0	0	0	0	0	0	0	0	0	0
8748462	A26f_a2l		interneuron		A2	left	bi/contra	10	0	0	0	0	0	0	0	0	0	0	0	0		10	0	0	0	0	0	0	0	0	0	0	0
4780447	A26f_a3l		interneuron		A3	left	bi/contra	5	0	0	0	0	0	0	0	0	0	0	0	0		5	0	0	0	0	0	0	0	0	0	0	0
15290335	A27e(2)_a1r		interneuron		A1	right	ipsa/ipsa	7	0	0	0	0	0	0	0	0	0	0	0	0		7	0	0	0	0	0	0	0	0	0	0	0
15504376	A27j2_a1r_GABA		interneuron		A1	right	ipsa/ipsa	13	0	0	0	0	0	0	0	0	0	0	0	0		0	0	0	0	0	0	0	0	1	12	0	0
10004243	A27k_a1r		interneuron		A1	right	ipsa/ipsa	6	0	0	0	0	0	0	0	0	0	0	0	0		0	0	0	0	0	0	0	0	4	2	0	0
4113612	A27k_a2r		interneuron		A2	right	ipsa/ipsa	17	0	0	0	0	0	0	0	0	0	0	0	0		10	0	0	0	0	0	0	0	4	3	0	0
4124563	A27n_a1r		interneuron		A1	right	ipsa/ipsa	7	0	0	0	0	0	0	0	0	0	0	0	0		7	0	0	0	0	0	0	0	0	0	0	0
4113595	A27neo_a1r		interneuron		A1	right	bi/ipsa	6	0	0	0	0	0	0	0	0	0	0	0	0		6	0	0	0	0	0	0	0	0	0	0	0
6264270	basin-related descending 1 sog_r			SEZ	SEZ	right	bi/contra	6	0	0	0	0	0	0	0	0	0	0	0	0		0	0	0	0	0	6	0	0	0	0	0	0
8196192	Jaam-1_a1l (HMD1 (A12p))		interneuron		A1	left	bi/contra	12	0	0	0	0	0	0	0	0	0	0	0	0		0	0	0	0	0	0	0	0	0	0	0	12
11466247	Jaam-2_a1l (HMD2 (A12g))		interneuron		A1	left	bi/contra	10	0	0	0	0	0	0	0	0	0	0	0	0		0	0	0	0	0	0	0	0	8	1	0	1
15560343	Jupiter A08h2 a3r (neuron 15560344)		interneuron		A3	right	bi/contra	2	0	0	0	0	0	0	0	0	0	0	0	0		0	0	0	2	0	0	0	0	0	0	0	0
19754483	Pre A08/goro neuron 19754484_a8l		interneuron		A8	left		2	0	0	0	0	0	0	0	0	0	0	0	0		0	0	0	0	0	0	2	0	0	0	0	0
3693553	pre-A08o_t3l		interneuron		T3	left		11	0	0	0	0	0	0	0	0	0	0	0	0		0	0	0	0	0	0	9	2	0	0	0	0
5253131	Pre-goro12_t3l		interneuron		T3	left		7	0	0	0	0	0	0	0	0	0	0	0	0		0	0	0	0	0	0	7	0	0	0	0	0
4104476	T01d1_t3l		interneuron		T3	left	ipsa/contra	17	0	0	0	0	0	0	0	0	0	0	0	0		17	0	0	0	0	0	0	0	0	0	0	0
4123487	T01d2_t3l		interneuron		T3	left	ipsa/contra	7	0	0	0	0	0	0	0	0	0	0	0	0		7	0	0	0	0	0	0	0	0	0	0	0
