# Supplementary material for: Sequential addition of neuronal stem cell temporal cohorts generates a feed-forward circuit in the Drosophila larval nerve cord
Source: eLife. 2022 Jun 20;11:e79276. doi: 10.7554/eLife.79276 (PMC9333992; doi:10.7554/eLife.79276)
Supplement: Figure 5—source data 1. [file elife-79276-fig5-data1.xlsx]

## Sheet: Sheet1
	undiff A1L	undiff A1R	MN22/23 A1L	MN22/23 A1R	A08x A1L	A08x A1R	A08j1 A1L	A08j1 A1R	A08j3 A1L	A08j3 A1R	A08j2 A1L	A08j2 A1R	A08m A1L	A08m A1R	A08o A1L	A08o A1R	A08c A1L	A08c A1R	A08s A1L	A08s A1R	A08e3 A1L	A08e3 A1R	A08e1 A1L	A08e1 AIR	A08e2 A1L	A08e2 A1R
undiff A1L	NaN	NaN	NaN	NaN	NaN	NaN	NaN	NaN	NaN	NaN	NaN	NaN	NaN	NaN	NaN	NaN	NaN	NaN	NaN	NaN	NaN	NaN	NaN	NaN	NaN	NaN
undiff A1R	NaN	NaN	NaN	NaN	NaN	NaN	NaN	NaN	NaN	NaN	NaN	NaN	NaN	NaN	NaN	NaN	NaN	NaN	NaN	NaN	NaN	NaN	NaN	NaN	NaN	NaN
MN22/23 A1L	NaN	NaN	NaN	-2.891	NaN	NaN	NaN	NaN	NaN	NaN	NaN	NaN	NaN	NaN	NaN	NaN	NaN	NaN	NaN	NaN	NaN	NaN	NaN	NaN	NaN	NaN
MN22/23 A1R	NaN	NaN	-2.891	NaN	NaN	NaN	NaN	NaN	NaN	NaN	NaN	NaN	NaN	NaN	NaN	NaN	NaN	NaN	NaN	NaN	NaN	NaN	NaN	NaN	NaN	NaN
A08x A1L	NaN	NaN	NaN	NaN	NaN	-10.2112	NaN	NaN	-6.74451	-6.60095	-2.99277	NaN	-5.26467	NaN	NaN	NaN	NaN	NaN	NaN	NaN	NaN	NaN	NaN	NaN	NaN	NaN
A08x A1R	NaN	NaN	NaN	NaN	-10.2112	NaN	NaN	NaN	-2.24991	-2.93324	NaN	NaN	NaN	-6.78234	NaN	NaN	NaN	NaN	NaN	NaN	NaN	NaN	NaN	NaN	NaN	NaN
A08j1 A1L	NaN	NaN	NaN	NaN	NaN	NaN	NaN	-22.6726	-12.0026	-10.9688	-4.94519	NaN	NaN	NaN	NaN	NaN	NaN	NaN	NaN	NaN	NaN	NaN	NaN	NaN	NaN	NaN
A08j1 A1R	NaN	NaN	NaN	NaN	NaN	NaN	-22.6726	NaN	-12.2424	-15.0135	-2.98012	NaN	NaN	NaN	NaN	NaN	NaN	NaN	NaN	NaN	NaN	NaN	NaN	NaN	NaN	NaN
A08j3 A1L	NaN	NaN	NaN	NaN	-6.74451	-2.24991	-12.0026	-12.2424	NaN	-47.1151	-7.33035	-3.98873	NaN	NaN	NaN	NaN	NaN	NaN	NaN	NaN	NaN	NaN	NaN	NaN	NaN	NaN
A08j3 A1R	NaN	NaN	NaN	NaN	-6.60095	-2.93324	-10.9688	-15.0135	-47.1151	NaN	-7.01992	-8.58985	NaN	NaN	NaN	NaN	NaN	NaN	NaN	NaN	NaN	NaN	NaN	NaN	NaN	NaN
A08j2 A1L	NaN	NaN	NaN	NaN	-2.99277	NaN	-4.94519	-2.98012	-7.33035	-7.01992	NaN	-11.5198	NaN	NaN	NaN	NaN	NaN	NaN	NaN	NaN	NaN	NaN	NaN	NaN	NaN	NaN
A08j2 A1R	NaN	NaN	NaN	NaN	NaN	NaN	NaN	NaN	-3.98873	-8.58985	-11.5198	NaN	NaN	NaN	NaN	NaN	NaN	NaN	NaN	NaN	NaN	NaN	NaN	NaN	NaN	NaN
A08m A1L	NaN	NaN	NaN	NaN	-5.26467	NaN	NaN	NaN	NaN	NaN	NaN	NaN	NaN	NaN	NaN	NaN	NaN	NaN	NaN	NaN	NaN	NaN	NaN	NaN	NaN	NaN
A08m A1R	NaN	NaN	NaN	NaN	NaN	-6.78234	NaN	NaN	NaN	NaN	NaN	NaN	NaN	NaN	NaN	NaN	NaN	NaN	NaN	NaN	NaN	NaN	NaN	NaN	NaN	NaN
A08o A1L	NaN	NaN	NaN	NaN	NaN	NaN	NaN	NaN	NaN	NaN	NaN	NaN	NaN	NaN	NaN	NaN	-2.2622	NaN	NaN	NaN	NaN	NaN	-5.0064	NaN	NaN	NaN
A08o A1R	NaN	NaN	NaN	NaN	NaN	NaN	NaN	NaN	NaN	NaN	NaN	NaN	NaN	NaN	NaN	NaN	NaN	NaN	NaN	NaN	NaN	NaN	NaN	NaN	NaN	NaN
A08c A1L	NaN	NaN	NaN	NaN	NaN	NaN	NaN	NaN	NaN	NaN	NaN	NaN	NaN	NaN	-2.2622	NaN	NaN	NaN	-4.63408	NaN	NaN	NaN	NaN	NaN	NaN	NaN
A08c A1R	NaN	NaN	NaN	NaN	NaN	NaN	NaN	NaN	NaN	NaN	NaN	NaN	NaN	NaN	NaN	NaN	NaN	NaN	NaN	-4.68757	NaN	-2.52825	NaN	NaN	NaN	NaN
A08s A1L	NaN	NaN	NaN	NaN	NaN	NaN	NaN	NaN	NaN	NaN	NaN	NaN	NaN	NaN	NaN	NaN	-4.63408	NaN	NaN	NaN	-11.9233	NaN	NaN	-2.13012	NaN	NaN
A08s A1R	NaN	NaN	NaN	NaN	NaN	NaN	NaN	NaN	NaN	NaN	NaN	NaN	NaN	NaN	NaN	NaN	NaN	-4.68757	NaN	NaN	NaN	-17.0183	-2.88425	NaN	NaN	-2.9992
A08e3 A1L	NaN	NaN	NaN	NaN	NaN	NaN	NaN	NaN	NaN	NaN	NaN	NaN	NaN	NaN	NaN	NaN	NaN	NaN	-11.9233	NaN	NaN	NaN	NaN	NaN	NaN	NaN
A08e3 A1R	NaN	NaN	NaN	NaN	NaN	NaN	NaN	NaN	NaN	NaN	NaN	NaN	NaN	NaN	NaN	NaN	NaN	-2.52825	NaN	-17.0183	NaN	NaN	NaN	NaN	NaN	-2.10623
A08e1 A1L	NaN	NaN	NaN	NaN	NaN	NaN	NaN	NaN	NaN	NaN	NaN	NaN	NaN	NaN	-5.0064	NaN	NaN	NaN	NaN	-2.88425	NaN	NaN	NaN	NaN	NaN	NaN
A08e1 AIR	NaN	NaN	NaN	NaN	NaN	NaN	NaN	NaN	NaN	NaN	NaN	NaN	NaN	NaN	NaN	NaN	NaN	NaN	-2.13012	NaN	NaN	NaN	NaN	NaN	NaN	NaN
A08e2 A1L	NaN	NaN	NaN	NaN	NaN	NaN	NaN	NaN	NaN	NaN	NaN	NaN	NaN	NaN	NaN	NaN	NaN	NaN	NaN	NaN	NaN	NaN	NaN	NaN	NaN	NaN
A08e2 A1R	NaN	NaN	NaN	NaN	NaN	NaN	NaN	NaN	NaN	NaN	NaN	NaN	NaN	NaN	NaN	NaN	NaN	NaN	NaN	-2.9992	NaN	-2.10623	NaN	NaN	NaN	NaN
