# Supplementary material for: Sequential addition of neuronal stem cell temporal cohorts generates a feed-forward circuit in the Drosophila larval nerve cord
Source: eLife. 2022 Jun 20;11:e79276. doi: 10.7554/eLife.79276 (PMC9333992; doi:10.7554/eLife.79276)
Supplement: Figure 5—source data 2. [file elife-79276-fig5-data2.xlsx]

## Sheet: Sheet1
	undiff A1L	undiff A1R	MN22/23 A1L	MN22/23 A1R	A08x A1L	A08x A1R	A08j1 A1L	A08j1 A1R	A08j3 A1L	A08j3 A1R	A08j2 A1L	A08j2 A1R	A08m A1L	A08m A1R	A08o A1L	A08o A1R	A08c A1L	A08c A1R	A08s A1L	A08s A1R	A08e3 A1L	A08e3 A1R	A08e1 A1L	A08e1 AIR	A08e2 A1L	A08e2 A1R
undiff A1L	NaN	NaN	NaN	NaN	NaN	NaN	NaN	NaN	NaN	NaN	NaN	NaN	NaN	NaN	NaN	NaN	NaN	NaN	NaN	NaN	NaN	NaN	NaN	NaN	NaN	NaN
undiff A1R	NaN	NaN	NaN	NaN	NaN	NaN	NaN	NaN	NaN	NaN	NaN	NaN	NaN	NaN	NaN	NaN	NaN	NaN	NaN	NaN	NaN	NaN	NaN	NaN	NaN	NaN
MN22/23 A1L	NaN	NaN	NaN	NaN	2.26537	2.58041	2.26806	2.34397	2.14108	2.07403	2.29653	2.27255	NaN	NaN	NaN	NaN	NaN	2.11408	NaN	2.04956	NaN	NaN	NaN	NaN	NaN	NaN
MN22/23 A1R	NaN	NaN	NaN	NaN	2.0666	NaN	NaN	NaN	2.12006	2.25513	2.36187	2.40561	NaN	NaN	NaN	NaN	2.02674	NaN	NaN	NaN	NaN	NaN	NaN	NaN	NaN	NaN
A08x A1L	NaN	NaN	2.26537	2.0666	NaN	NaN	2.35057	2.05125	NaN	NaN	NaN	NaN	NaN	NaN	2.37538	2.20187	2.75129	2.87355	2.40472	2.47814	NaN	2.21899	2.676	2.04388	2.3137	2.95981
A08x A1R	NaN	NaN	2.58041	NaN	NaN	NaN	2.33215	2.07475	NaN	NaN	NaN	NaN	NaN	NaN	2.27185	2.17745	2.62713	2.21191	2.85606	2.93508	NaN	NaN	3.09783	2.52087	2.39947	2.21613
A08j1 A1L	NaN	NaN	2.26806	NaN	2.35057	2.33215	NaN	NaN	NaN	NaN	NaN	NaN	NaN	NaN	NaN	2.50069	2.55472	2.61236	2.20875	2.54039	NaN	NaN	2.13736	NaN	2.09467	1.98438
A08j1 A1R	NaN	NaN	2.34397	NaN	2.05125	2.07475	NaN	NaN	NaN	NaN	NaN	NaN	NaN	NaN	NaN	NaN	2.44184	2.7759	2.14132	2.34795	NaN	NaN	2.11724	1.96708	2.22517	NaN
A08j3 A1L	NaN	NaN	2.14108	2.12006	NaN	NaN	NaN	NaN	NaN	NaN	NaN	NaN	NaN	NaN	NaN	NaN	2.50457	2.77023	2.5906	2.59823	NaN	NaN	2.3364	2.69377	2.50041	2.25667
A08j3 A1R	NaN	NaN	2.07403	2.25513	NaN	NaN	NaN	NaN	NaN	NaN	NaN	NaN	NaN	NaN	NaN	NaN	2.53075	2.6072	2.42176	2.82874	NaN	NaN	2.80623	2.3185	2.53664	2.17352
A08j2 A1L	NaN	NaN	2.29653	2.36187	NaN	NaN	NaN	NaN	NaN	NaN	NaN	NaN	NaN	NaN	2.01431	2.60872	3.37683	2.82861	2.92787	3.03747	2.2892	NaN	2.53769	2.53746	2.61389	2.21946
A08j2 A1R	NaN	NaN	2.27255	2.40561	NaN	NaN	NaN	NaN	NaN	NaN	NaN	NaN	NaN	NaN	NaN	NaN	2.80762	3.05629	2.71198	2.7061	2.41247	NaN	2.46765	2.24544	2.53545	2.43768
A08m A1L	NaN	NaN	NaN	NaN	NaN	NaN	NaN	NaN	NaN	NaN	NaN	NaN	NaN	2.19132	NaN	NaN	NaN	NaN	NaN	2.0759	NaN	NaN	NaN	NaN	NaN	1.99441
A08m A1R	NaN	NaN	NaN	NaN	NaN	NaN	NaN	NaN	NaN	NaN	NaN	NaN	2.19132	NaN	NaN	NaN	NaN	NaN	NaN	NaN	NaN	NaN	NaN	NaN	NaN	NaN
A08o A1L	NaN	NaN	NaN	NaN	2.37538	2.27185	NaN	NaN	NaN	NaN	2.01431	NaN	NaN	NaN	NaN	NaN	NaN	2.32543	NaN	2.17451	NaN	NaN	NaN	NaN	NaN	NaN
A08o A1R	NaN	NaN	NaN	NaN	2.20187	2.17745	2.50069	NaN	NaN	NaN	2.60872	NaN	NaN	NaN	NaN	NaN	NaN	NaN	NaN	NaN	NaN	NaN	NaN	NaN	2.00271	NaN
A08c A1L	NaN	NaN	NaN	2.02674	2.75129	2.62713	2.55472	2.44184	2.50457	2.53075	3.37683	2.80762	NaN	NaN	NaN	NaN	NaN	NaN	NaN	NaN	NaN	NaN	2.15067	NaN	1.97373	NaN
A08c A1R	NaN	NaN	2.11408	NaN	2.87355	2.21191	2.61236	2.7759	2.77023	2.6072	2.82861	3.05629	NaN	NaN	2.32543	NaN	NaN	NaN	NaN	NaN	NaN	NaN	NaN	NaN	NaN	NaN
A08s A1L	NaN	NaN	NaN	NaN	2.40472	2.85606	2.20875	2.14132	2.5906	2.42176	2.92787	2.71198	NaN	NaN	NaN	NaN	NaN	NaN	NaN	NaN	NaN	NaN	NaN	NaN	NaN	NaN
A08s A1R	NaN	NaN	2.04956	NaN	2.47814	2.93508	2.54039	2.34795	2.59823	2.82874	3.03747	2.7061	2.0759	NaN	2.17451	NaN	NaN	NaN	NaN	NaN	NaN	NaN	NaN	NaN	NaN	NaN
A08e3 A1L	NaN	NaN	NaN	NaN	NaN	NaN	NaN	NaN	NaN	NaN	2.2892	2.41247	NaN	NaN	NaN	NaN	NaN	NaN	NaN	NaN	NaN	NaN	NaN	NaN	NaN	NaN
A08e3 A1R	NaN	NaN	NaN	NaN	2.21899	NaN	NaN	NaN	NaN	NaN	NaN	NaN	NaN	NaN	NaN	NaN	NaN	NaN	NaN	NaN	NaN	NaN	NaN	NaN	NaN	NaN
A08e1 A1L	NaN	NaN	NaN	NaN	2.676	3.09783	2.13736	2.11724	2.3364	2.80623	2.53769	2.46765	NaN	NaN	NaN	NaN	2.15067	NaN	NaN	NaN	NaN	NaN	NaN	NaN	NaN	NaN
A08e1 AIR	NaN	NaN	NaN	NaN	2.04388	2.52087	NaN	1.96708	2.69377	2.3185	2.53746	2.24544	NaN	NaN	NaN	NaN	NaN	NaN	NaN	NaN	NaN	NaN	NaN	NaN	NaN	NaN
A08e2 A1L	NaN	NaN	NaN	NaN	2.3137	2.39947	2.09467	2.22517	2.50041	2.53664	2.61389	2.53545	NaN	NaN	NaN	2.00271	1.97373	NaN	NaN	NaN	NaN	NaN	NaN	NaN	NaN	NaN
A08e2 A1R	NaN	NaN	NaN	NaN	2.95981	2.21613	1.98438	NaN	2.25667	2.17352	2.21946	2.43768	1.99441	NaN	NaN	NaN	NaN	NaN	NaN	NaN	NaN	NaN	NaN	NaN	NaN	NaN
