# Supplementary material for: Sequential addition of neuronal stem cell temporal cohorts generates a feed-forward circuit in the Drosophila larval nerve cord
Source: eLife. 2022 Jun 20;11:e79276. doi: 10.7554/eLife.79276 (PMC9333992; doi:10.7554/eLife.79276)
Supplement: Figure 5—source data 3. [file elife-79276-fig5-data3.xlsx]

## Sheet: Sheet1
	undiff A1L	undiff A1R	MN22/23 A1L	MN22/23 A1R	A08x A1L	A08x A1R	A08j1 A1L	A08j1 A1R	A08j3 A1L	A08j3 A1R	A08j2 A1L	A08j2 A1R	A08m A1L	A08m A1R	A08o A1L	A08o A1R	A08c A1L	A08c A1R	A08s A1L	A08s A1R	A08e3 A1L	A08e3 A1R	A08e1 A1L	A08e1 AIR	A08e2 A1L	A08e2 A1R
undiff A1L	NaN	NaN	NaN	NaN	NaN	NaN	NaN	NaN	NaN	NaN	NaN	NaN	NaN	NaN	NaN	NaN	NaN	NaN	NaN	NaN	NaN	NaN	NaN	NaN	NaN	NaN
undiff A1R	NaN	NaN	NaN	NaN	NaN	NaN	NaN	NaN	NaN	NaN	NaN	NaN	NaN	NaN	NaN	NaN	NaN	NaN	NaN	NaN	NaN	NaN	NaN	NaN	NaN	NaN
MN22/23 A1L	NaN	NaN	NaN	NaN	NaN	NaN	NaN	NaN	NaN	NaN	NaN	NaN	NaN	NaN	NaN	NaN	NaN	NaN	NaN	NaN	NaN	NaN	NaN	NaN	NaN	NaN
MN22/23 A1R	NaN	NaN	NaN	NaN	NaN	NaN	NaN	NaN	NaN	NaN	NaN	NaN	NaN	NaN	NaN	NaN	NaN	NaN	NaN	NaN	NaN	NaN	NaN	NaN	NaN	NaN
A08x A1L	NaN	NaN	NaN	NaN	NaN	-11.1718	NaN	NaN	-5.85919	-3.27075	-3.44562	NaN	-6.7478	NaN	NaN	NaN	NaN	NaN	NaN	NaN	NaN	NaN	NaN	NaN	NaN	NaN
A08x A1R	NaN	NaN	NaN	NaN	-11.1718	NaN	NaN	NaN	-2.59792	NaN	NaN	NaN	-2.67743	-6.64874	NaN	NaN	NaN	NaN	NaN	NaN	NaN	NaN	NaN	NaN	NaN	NaN
A08j1 A1L	NaN	NaN	NaN	NaN	NaN	NaN	NaN	-23.9115	-10.4001	-8.68366	-4.61476	NaN	NaN	NaN	NaN	NaN	NaN	NaN	NaN	NaN	NaN	NaN	NaN	NaN	NaN	NaN
A08j1 A1R	NaN	NaN	NaN	NaN	NaN	NaN	-23.9115	NaN	-10.2106	-21.4115	-2.01017	NaN	NaN	NaN	NaN	NaN	NaN	NaN	NaN	NaN	NaN	NaN	NaN	NaN	NaN	NaN
A08j3 A1L	NaN	NaN	NaN	NaN	-5.85919	-2.59792	-10.4001	-10.2106	NaN	-40.9036	-8.56965	-4.08813	NaN	NaN	NaN	NaN	NaN	NaN	NaN	NaN	NaN	NaN	NaN	NaN	NaN	NaN
A08j3 A1R	NaN	NaN	NaN	NaN	-3.27075	NaN	-8.68366	-21.4115	-40.9036	NaN	-8.17808	-6.19152	NaN	NaN	NaN	NaN	NaN	NaN	NaN	NaN	NaN	NaN	NaN	NaN	NaN	NaN
A08j2 A1L	NaN	NaN	NaN	NaN	-3.44562	NaN	-4.61476	-2.01017	-8.56965	-8.17808	NaN	-10.8954	NaN	NaN	NaN	NaN	NaN	NaN	NaN	NaN	NaN	NaN	NaN	NaN	NaN	NaN
A08j2 A1R	NaN	NaN	NaN	NaN	NaN	NaN	NaN	NaN	-4.08813	-6.19152	-10.8954	NaN	NaN	NaN	NaN	NaN	NaN	NaN	NaN	NaN	NaN	NaN	NaN	NaN	NaN	NaN
A08m A1L	NaN	NaN	NaN	NaN	-6.7478	-2.67743	NaN	NaN	NaN	NaN	NaN	NaN	NaN	NaN	NaN	NaN	NaN	NaN	NaN	NaN	NaN	NaN	NaN	NaN	NaN	NaN
A08m A1R	NaN	NaN	NaN	NaN	NaN	-6.64874	NaN	NaN	NaN	NaN	NaN	NaN	NaN	NaN	NaN	NaN	NaN	NaN	NaN	NaN	NaN	NaN	NaN	NaN	NaN	NaN
A08o A1L	NaN	NaN	NaN	NaN	NaN	NaN	NaN	NaN	NaN	NaN	NaN	NaN	NaN	NaN	NaN	NaN	-2.24607	NaN	NaN	NaN	NaN	NaN	-4.18467	NaN	NaN	NaN
A08o A1R	NaN	NaN	NaN	NaN	NaN	NaN	NaN	NaN	NaN	NaN	NaN	NaN	NaN	NaN	NaN	NaN	NaN	-2.0676	NaN	NaN	NaN	NaN	NaN	NaN	NaN	NaN
A08c A1L	NaN	NaN	NaN	NaN	NaN	NaN	NaN	NaN	NaN	NaN	NaN	NaN	NaN	NaN	-2.24607	NaN	NaN	NaN	-3.74373	NaN	NaN	NaN	NaN	NaN	NaN	NaN
A08c A1R	NaN	NaN	NaN	NaN	NaN	NaN	NaN	NaN	NaN	NaN	NaN	NaN	NaN	NaN	NaN	-2.0676	NaN	NaN	NaN	-2.86271	NaN	-3.07098	NaN	NaN	NaN	NaN
A08s A1L	NaN	NaN	NaN	NaN	NaN	NaN	NaN	NaN	NaN	NaN	NaN	NaN	NaN	NaN	NaN	NaN	-3.74373	NaN	NaN	NaN	-15.9164	NaN	NaN	-2.82787	NaN	NaN
A08s A1R	NaN	NaN	NaN	NaN	NaN	NaN	NaN	NaN	NaN	NaN	NaN	NaN	NaN	NaN	NaN	NaN	NaN	-2.86271	NaN	NaN	NaN	-11.5783	-3.55194	NaN	NaN	-2.24705
A08e3 A1L	NaN	NaN	NaN	NaN	NaN	NaN	NaN	NaN	NaN	NaN	NaN	NaN	NaN	NaN	NaN	NaN	NaN	NaN	-15.9164	NaN	NaN	NaN	NaN	NaN	NaN	NaN
A08e3 A1R	NaN	NaN	NaN	NaN	NaN	NaN	NaN	NaN	NaN	NaN	NaN	NaN	NaN	NaN	NaN	NaN	NaN	-3.07098	NaN	-11.5783	0.542453	NaN	NaN	NaN	NaN	-2.6314
A08e1 A1L	NaN	NaN	NaN	NaN	NaN	NaN	NaN	NaN	NaN	NaN	NaN	NaN	NaN	NaN	-4.18467	NaN	NaN	NaN	NaN	-3.55194	NaN	NaN	NaN	NaN	NaN	NaN
A08e1 AIR	NaN	NaN	NaN	NaN	NaN	NaN	NaN	NaN	NaN	NaN	NaN	NaN	NaN	NaN	NaN	NaN	NaN	NaN	-2.82787	NaN	NaN	NaN	NaN	NaN	NaN	NaN
A08e2 A1L	NaN	NaN	NaN	NaN	NaN	NaN	NaN	NaN	NaN	NaN	NaN	NaN	NaN	NaN	NaN	NaN	NaN	NaN	NaN	NaN	NaN	NaN	NaN	NaN	NaN	NaN
A08e2 A1R	NaN	NaN	NaN	NaN	NaN	NaN	NaN	NaN	NaN	NaN	NaN	NaN	NaN	NaN	NaN	NaN	NaN	NaN	NaN	-2.24705	NaN	-2.6314	NaN	NaN	NaN	NaN
