# Supplementary material for: Sequential addition of neuronal stem cell temporal cohorts generates a feed-forward circuit in the Drosophila larval nerve cord
Source: eLife. 2022 Jun 20;11:e79276. doi: 10.7554/eLife.79276 (PMC9333992; doi:10.7554/eLife.79276)
Supplement: Figure 6—source data 2. [file elife-79276-fig6-data2.xlsx]

## Sheet: Sheet1
Number of synapses onto early born ELs in A1L/R	CHOs, Ladders, Basins, and Early-born ELs from segments other than A1	All other sensory or nerve cord interneurons
1-4 synapses	60	133
5-9 synapses	33	37
10-14 synapses	22	6
15-19 synapses	14	2
20-24 synapes	7	0
25-29 synapses	5	0
30-34 synapses	2	0
35-39 synapses	1	0
40-44 synapses	0	2
45+ synapse	1	0
