# Supplementary material for: Sequential addition of neuronal stem cell temporal cohorts generates a feed-forward circuit in the Drosophila larval nerve cord
Source: eLife. 2022 Jun 20;11:e79276. doi: 10.7554/eLife.79276 (PMC9333992; doi:10.7554/eLife.79276)
Supplement: Figure 7—source data 1. [file elife-79276-fig7-data1.xlsx]

## Sheet: Sheet1
	A08x_A1L			A08j1_A1L			A08j3_A1L			A08j2_A1L			A08m_A1L
	Synapses from	Percent of all synaptic input	Percent of (INs + CHO only) synaptic input	Synapses from	Percent of all synaptic input	Percent of (INs + CHO only) synaptic input	Synapses from	Percent of all synaptic input	Percent of (INs + CHO only) synaptic input	Synapses from	Percent of all synaptic input	Percent of (INs + CHO only) synaptic input	Synapses from	Percent of all synaptic input	Percent of (INs + CHO only) synaptic input		Combined left-right (INs + CHO only) total
Basins Left	4	0.0162602	0.0218579	0	0	0	0	0	0	0	0	0	1	0.00574713	0.00735294			A08j1-3			A08x			A08m
Basins Right	29	0.117886	0.15847	0	0	0	0	0	0	0	0	0	26	0.149425	0.191176			Average	Stdev		Average	Stdev		Average	Stdev
other A08 Left	26	0.105691	0.142077	0	0	0	18	0.0523256	0.0622837	7	0.027668	0.0380435	2	0.0114943	0.0147059
other A08 Right	2	0.00813008	0.010929	3	0.00773196	0.00872093	19	0.0552326	0.0657439	16	0.0632411	0.0869565	3	0.0172414	0.0220588		Basins Left	0	0		0.0395748	0.0655668		0.00798682	0.000896434
Ladders	31	0.126016	0.169399	47	0.121134	0.136628	63	0.18314	0.217993	52	0.205534	0.282609	0	0	0		Basins Right	0	0		0.136527	0.0715438		0.220588	0.0415945
CHO Left	4	0.0162602	0.0218579	132	0.340206	0.383721	24	0.0697674	0.083045	9	0.0355731	0.048913	0	0	0		other A08 Left	0.0361504	0.0304448		0.146559	0.00633933		0.00735294	0.0103986
CHO Right	6	0.0243902	0.0327869	88	0.226804	0.255814	18	0.0523256	0.0622837	32	0.126482	0.173913	9	0.0517241	0.0661765		other A08 Right	0.0501299	0.0310046		0.0236936	0.018052		0.0110294	0.0155979
																	Ladders	0.222492	0.0574934		0.136783	0.0461262		0.012931	0.0182872
		all	INs + CHOs		all	INs + CHOs		all	INs + CHOs		all	INs + CHOs		all	INs + CHOs		CHO Left	0.173011	0.133176		0.026554	0.0154559		0.0517241	0.073149
Total synapse #		246	183		388	344		344	289		253	184		174	136		CHO Right	0.20734	0.104201		0.0163934	0.00108674		0.0848124	0.0163151
indirect CHO input from	Basin L	Basin R	Ladders	Basin L	Basin R	Ladders	Basin L	Basin R	Ladders	Basin L	Basin R	Ladders	Basin L	Basin R	Ladders
	0.22	0.23	0.32			0.4			0.28			0.27	0.11	0.29	0
	A08x_A1R			A08j1_A1R			A08j3_A1R			A08j2_A1R			A08m_A1R
	Synapses from	Percent of all synaptic input	Percent of (INs + CHO only) synaptic input	Synapses from	Percent of all synaptic input	Percent of (INs + CHO only) synaptic input	Synapses from	Percent of all synaptic input	Percent of (INs + CHO only) synaptic input	Synapses from	Percent of all synaptic input	Percent of (INs + CHO only) synaptic input	Synapses from	Percent of all synaptic input	Percent of (INs + CHO only) synaptic input
Basins Left	22	0.092827	0.114583	0	0	0	0	0	0	0	0	0	1	0.00574713	0.00862069
Basins Right	11	0.0464135	0.0572917	0	0	0	0	0	0	0	0	0	29	0.166667	0.25
other A08 Left	7	0.0295359	0.0364583	1	0.00257732	0.00529101	22	0.0639535	0.077193	6	0.0237154	0.0340909	0	0	0
other A08 Right	29	0.122363	0.151042	3	0.00773196	0.015873	19	0.0552326	0.0666667	10	0.0395257	0.0568182	0	0	0
Ladders	20	0.0843882	0.104167	55	0.141753	0.291005	56	0.162791	0.196491	37	0.146245	0.210227	3	0.0172414	0.0258621
CHO Left	0	0	0	53	0.136598	0.280423	22	0.0639535	0.077193	29	0.114625	0.164773	12	0.0689655	0.103448
CHO Right	6	0.0253165	0.03125	70	0.180412	0.37037	44	0.127907	0.154386	40	0.158103	0.227273	5	0.0287356	0.0431034
		all	INs + CHOs		all	INs + CHOs		all	INs + CHOs		all	INs + CHOs		all	INs + CHOs
Total synapse #		237	192		241	189		351	285		242	176		139	116
indirect CHO input from	Basin L	Basin R	Ladders	Basin L	Basin R	Ladders	Basin L	Basin R	Ladders	Basin L	Basin R	Ladders	Basin L	Basin R	Ladders
	0.24	0.27	0.32			0.4			0.3			0.28	0	0.25	42
		IN = interneuron
		SN = sensory neuron
		CB = central brain
		SEZ = subesophageal zone
		CHO = chordotonal sensory neuron
