# Supplementary material for: Sequential addition of neuronal stem cell temporal cohorts generates a feed-forward circuit in the Drosophila larval nerve cord
Source: eLife. 2022 Jun 20;11:e79276. doi: 10.7554/eLife.79276 (PMC9333992; doi:10.7554/eLife.79276)
Supplement: Figure 9—source data 2. [file elife-79276-fig9-data2.xlsx]

## Sheet: Sheet1
	Down and back	Low crossing	IpsaBrain	Medial crossing	Contral LN	ContraBrain	ASB SOG LH	A01k	Basin 2	Basin 1	Basin 3	Basin 4	Crescent
Down and back	NaN	NaN	NaN	NaN	NaN	NaN	NaN	NaN	-11.3441	NaN	-2.67901	-40.043	NaN
Low crossing	NaN	NaN	NaN	NaN	NaN	NaN	NaN	NaN	NaN	NaN	NaN	NaN	NaN
IpsaBrain	NaN	NaN	NaN	NaN	NaN	NaN	NaN	NaN	NaN	NaN	NaN	NaN	NaN
Medial crossing	NaN	NaN	NaN	NaN	-6.73781	NaN	NaN	NaN	NaN	NaN	NaN	NaN	NaN
Contral LN	NaN	NaN	NaN	-6.73781	NaN	NaN	NaN	NaN	NaN	NaN	NaN	NaN	NaN
ContraBrain	NaN	NaN	NaN	NaN	NaN	NaN	NaN	NaN	NaN	NaN	NaN	NaN	NaN
ASB SOG LH	NaN	NaN	NaN	NaN	NaN	NaN	NaN	NaN	NaN	NaN	NaN	NaN	NaN
A01k	NaN	NaN	NaN	NaN	NaN	NaN	NaN	NaN	NaN	NaN	NaN	NaN	NaN
Basin 2	-11.3441	NaN	NaN	NaN	NaN	NaN	NaN	NaN	NaN	-7.06781	-12.4891	-14.6398	NaN
Basin 1	NaN	NaN	NaN	NaN	NaN	NaN	NaN	NaN	-7.06781	NaN	-16.4832	NaN	-10.7281
Basin 3	-2.67901	NaN	NaN	NaN	NaN	NaN	NaN	NaN	-12.4891	-16.4832	NaN	-10.7157	-4.94239
Basin 4	-40.043	NaN	NaN	NaN	NaN	NaN	NaN	NaN	-14.6398	NaN	-10.7157	NaN	NaN
Crescent	NaN	NaN	NaN	NaN	NaN	NaN	NaN	NaN	NaN	-10.7281	-4.94239	NaN	NaN
