# Supplementary material for: Sequential addition of neuronal stem cell temporal cohorts generates a feed-forward circuit in the Drosophila larval nerve cord
Source: eLife. 2022 Jun 20;11:e79276. doi: 10.7554/eLife.79276 (PMC9333992; doi:10.7554/eLife.79276)
Supplement: Figure 9—source data 3. [file elife-79276-fig9-data3.xlsx]

## Sheet: Sheet1
	Down and back	Low crossing	IpsaBrain	Medial crossing	Contral LN	ContraBrain	ASB SOG LH	A01k	Basin 2	Basin 1	Basin 3	Basin 4	Crescent
Down and back	NaN	NaN	NaN	NaN	NaN	NaN	NaN	NaN	-16.8437	NaN	-2.4439	-25.0336	NaN
Low crossing	NaN	NaN	NaN	NaN	NaN	NaN	NaN	NaN	NaN	NaN	NaN	NaN	NaN
IpsaBrain	NaN	NaN	NaN	NaN	NaN	NaN	NaN	NaN	NaN	NaN	NaN	NaN	NaN
Medial crossing	NaN	NaN	NaN	NaN	-2.26421	NaN	-5.12498	NaN	NaN	NaN	NaN	NaN	NaN
Contral LN	NaN	NaN	NaN	-2.26421	NaN	NaN	NaN	NaN	NaN	NaN	NaN	NaN	NaN
ContraBrain	NaN	NaN	NaN	NaN	NaN	NaN	NaN	NaN	NaN	NaN	NaN	NaN	NaN
ASB SOG LH	NaN	NaN	NaN	-5.12498	NaN	NaN	NaN	NaN	NaN	NaN	NaN	NaN	NaN
A01k	NaN	NaN	NaN	NaN	NaN	NaN	NaN	NaN	NaN	NaN	NaN	NaN	NaN
Basin 2	-16.8437	NaN	NaN	NaN	NaN	NaN	NaN	NaN	NaN	-9.3263	-9.39315	-11.7346	NaN
Basin 1	NaN	NaN	NaN	NaN	NaN	NaN	NaN	NaN	-9.3263	NaN	-7.91571	-4.78804	-5.87506
Basin 3	-2.4439	NaN	NaN	NaN	NaN	NaN	NaN	NaN	-9.39315	-7.91571	NaN	-23.2136	-2.58105
Basin 4	-25.0336	NaN	NaN	NaN	NaN	NaN	NaN	NaN	-11.7346	-4.78804	-23.2136	NaN	NaN
Crescent	NaN	NaN	NaN	NaN	NaN	NaN	NaN	NaN	NaN	-5.87506	-2.58105	NaN	NaN
