# Supplementary material for: Sequential addition of neuronal stem cell temporal cohorts generates a feed-forward circuit in the Drosophila larval nerve cord
Source: eLife. 2022 Jun 20;11:e79276. doi: 10.7554/eLife.79276 (PMC9333992; doi:10.7554/eLife.79276)
Supplement: Figure 9—source data 4. [file elife-79276-fig9-data4.xlsx]

## Sheet: Sheet1
NB3-5 Cortex Neurite Length		Distance from cell body to edge of neurpil
		(in microns)
Rank	Neuron Name	Segment a1L	Segment a1R	Average
1	Down and Back A09l	4.489	6.677	5.583
2	Low crossing	8.72	6.628	7.674
3	IpsaBrain	7.635	7.52	7.5775
4	Medial crossing	8.337	7.463	7.9
5	Contra LN	7.311	12.375	9.843
6	ContraBrain	7.804	19.184	13.494
7	ASB SOG-LH Dense Core	11.06	10.031	10.5455
8	A01k	11.662	9.962	10.812
9	Basin-2	14.685	10.14	12.4125
10	Basin-1	12.19	14.234	13.212
11	Basin-3	17.097	17.663	17.38
12	Basin-4	15.76	16.822	16.291
13	crescent	15.931	15.768	15.8495
