# Supplementary material for: Sequential addition of neuronal stem cell temporal cohorts generates a feed-forward circuit in the Drosophila larval nerve cord
Source: eLife. 2022 Jun 20;11:e79276. doi: 10.7554/eLife.79276 (PMC9333992; doi:10.7554/eLife.79276)
Supplement: Figure 10—source data 1. [file elife-79276-fig10-data1.xlsx]

## Sheet: Sheet1
			Synapses onto Ladder neurons
skelton ID	Upstream neuron name		Ladder-f a1	Ladder-c a1	Ladder-d_a1	Ladder-e a1	Ladder-b a1	Ladder-a_a1
7764785	lch5-1 a1l	CHO	0	6	0	0	0	1
7732444	lch5-1 a1r	CHO	0	8	0	4	0	1
7610801	lch5-1 a2r	CHO	0	0	0	1	0	0
21572898	lch5-1 or vch t1r sensory	CHO	0	4	0	0	0	5
987016	lch5-1 t3l	CHO	0	11	0	0	0	2			Synapse number	Precent
7551402	lch5-1_t3r	CHO	0	2	0	0	0	3		CHO	687	0.355774
7208962	lch5-1ish_t2l (neuron 720896)	CHO	0	4	0	0	0	2		ELs	84	0.0435008
7418771	lch5-2/4 ?	CHO	0	0	0	0	1	0		Ladders	258	0.13361
162293	lch5-2/4 a1l	CHO	1	0	3	0	14	0		Total	1931
159280	lch5-2/4 a1l	CHO	1	0	0	0	11	0
7577773	lch5-2/4 a1r	CHO	6	1	5	0	10	0
6276557	lch5-2/4 a1r	CHO	2	0	1	1	15	0
2792430	lch5-2/4 a2l	CHO	6	1	0	0	9	0
14966464	lch5-2/4 a2l	CHO	2	0	1	0	6	0
15608857	lch5-2/4 a2r	CHO	0	0	0	0	2	0
769563	lch5-2/4_a3l	CHO	1	0	1	0	1	0
7498606	lch5-2/4_a3r	CHO	2	0	0	0	1	0
7472862	lch5-2/4_a3r	CHO	0	0	0	0	2	0
131382	lch5-2/4_a4l	CHO	2	0	0	0	1	1
218296	lch5-2/4_a4l	CHO	0	0	0	0	0	1
819698	lch5-2/4_a4r	CHO	0	0	1	0	0	0
115880	lch5-2/4_a5l	CHO	3	0	0	0	0	0
11023891	lch5-2/4_a5l	CHO	0	0	1	0	0	0
230801	lch5-2/4_a6l	CHO	0	0	1	0	0	0
830870	lch5-2/4_a6l	CHO	1	0	0	0	0	0
2820201	lch5-2/4_a7r (sensory neuron 2820202)	CHO	1	0	0	0	0	1
11044044	lch5-2/4_a8/9l	CHO	1	0	0	0	0	0
20295083	lch5-2/4_a8/9r	CHO	4	0	0	0	0	2
11023963	lch5-2/4_a8l	CHO	1	0	0	0	0	0
2294672	lch5-2/4_a8l (bundles with)	CHO	1	1	0	0	0	2
1113488	lch5-2/4_contra_projection VLEL9_t3l		0	0	1	0	0	2
3586415	lch5-2/4_l unknown	CHO	4	0	1	0	0	0
15560552	lch5-2/4_r unknown	CHO	1	0	1	0	1	0
1171920	lch5-2/4_t1l? sensory neuron 1171921	CHO	1	2	0	0	0	0
7534835	lch5-2/4_t1r (sensory neuron 7534836)	CHO	1	0	0	0	0	0
15870533	lch5-2/4_t2l (neuron 15870533)	CHO	2	1	7	0	6	0
15870382	lch5-2/4_t2l (sensory neuron 15870383)	CHO	0	1	0	0	0	0
7576854	lch5-2/4_t2r	CHO	0	0	6	0	0	0
20295030	lch5-2/4_t2r (sensory neuron 20295031)	CHO	3	1	0	0	0	0
17277897	lch5-2/4_t3l (sensory neuron 17277898)	CHO	4	1	2	0	3	0
2294761	lch5-2/4? putative	CHO	1	0	0	0	0	0
2226852	lch5-24_contra_projection VLEL9_t3r	CHO	1	0	0	0	0	4
7476448	lch5-2ish_t3r	CHO	0	1	9	0	11	0
8031834	lch5-3 a1l	CHO	0	11	18	10	0	12
7686464	lch5-3 a1r	CHO	0	6	15	15	0	16
3582935	lch5-3 a2l	CHO	0	0	10	6	0	0
15577519	lch5-3 a2r	CHO	0	2	3	1	0	1
207983	lch5-3_a4l	CHO	0	0	0	1	0	0
309974	lch5-3_a5r	CHO	0	0	0	1	0	0
6753438	lch5-3/5_a2l (neuron 6753439)	CHO	1	1	1	6	0	0
20429402	lch5-3ish sensory neuron 20429403_t1r	CHO	0	5	0	0	0	1
7763691	lch5-5 a1l	CHO	3	4	1	10	1	0
7694722	lch5-5 a1r	CHO	1	8	4	22	1	0
11458329	lch5-5_a2r	CHO	0	0	1	3	0	0
218090	lch5-5_a4r	CHO	0	0	0	1	0	0
16394599	lch5-5ish sensory neuron 16394600	CHO	0	1	0	0	0	0
20295495	lch5-5ish_a3l (likely) sensory neuron 20295496	CHO	0	0	7	3	0	0
1047461	lch5-5ish_t2l (neuron 1047461)	CHO	0	11	1	0	0	0
7577924	lch5-5ish_t2r	CHO	0	4	0	0	0	0
7210938	lch5-5ish_t3l (neuron 7210939)	CHO	1	11	3	2	0	0
15521040	lch5-5ish_t3r	CHO	2	23	2	1	0	0
1075119	likely A26? t2	CHO	5	0	0	0	0	2
7801255	v'ch a1l	CHO	0	9	0	3	0	3
7628068	v'ch a1r	CHO	0	7	0	3	0	4
753051	vch t3l	CHO	0	0	0	8	0	0
7209350	vch? sensory t2r (neuron 7209351)	CHO	0	0	0	2	0	0
7790597	vchA/B a1l	CHO	0	0	1	34	0	0
7796832	vchA/B a1l	CHO	0	0	0	15	0	0
9771412	vchA/B a1r	CHO	0	0	0	27	0	1
7746883	vchA/B a1r	CHO	0	0	0	17	0	0
7733871	vchAB_t3r	CHO	0	1	0	4	0	0
4628271	A08h4b_a2l	EL	0	0	0	3	0	0
10158985	A08h4b_a2r	EL	0	0	0	3	0	0
8057753	A08j2_a1l	EL	1	0	4	0	0	0
10949030	A08j2_a1r	EL	1	0	0	0	0	0
8602741	A08j2_a2l	EL	0	0	4	0	0	0
19310779	A08j2_a2r	EL	2	0	7	0	0	2
4372691	A08m2? a3l	EL	0	0	0	1	1	7
12393624	A08m2? a3r	EL	0	1	0	0	0	10
20438424	A08v_a3l	EL	0	0	0	1	0	3
6246099	A08v_a3r	EL	0	0	0	1	0	0
3029998	A08v?_a4l	EL	0	0	0	0	0	8
7827759	A08v?_a4r	EL	1	0	0	0	0	8
8198913	VLEL4_a1r	EL	4	0	2	0	0	1
11455472	VLEL9_a1l	EL	0	0	3	0	0	0
8257672	VLEL9_a1r	EL	0	0	5	0	0	0
2667974	Ladder_(post lch5-2/4)_a3	Ladders	0	0	2	4	0	0
4913256	Ladder_(pre-lch5-3 axon)_a3	Ladders	0	0	0	2	0	0
16221632	Ladder_a7	Ladders	1	3	0	1	0	2
5602717	Ladder_t1 (descending)	Ladders	0	0	0	3	0	0
14535	Ladder_t1 with post T at 1637 (thoracic)	Ladders	0	0	3	0	0	0
4942150	Ladder_t1u	Ladders	1	0	1	0	0	0
4933586	Ladder_t3 max_descending	Ladders	0	1	1	1	0	1
20306340	Ladder_t3r mid_descending	Ladders	0	0	24	0	0	3
7657327	Ladder-a a2	Ladders	0	2	1	9	0	0
11995	Ladder-a_a1	Ladders	0	1	2	4	0	0
8614658	Ladder-a_t3l	Ladders	5	2	15	2	0	1
471755	Ladder-b a1	Ladders	0	1	0	26	0	0
7606082	Ladder-b a2	Ladders	0	0	0	2	0	0
2429370	Ladder-b_a3	Ladders	0	0	0	1	0	3
160708	Ladder-b_t3	Ladders	0	6	0	9	0	0
471720	Ladder-c a1	Ladders	2	0	7	1	0	2
7606126	Ladder-c a2	Ladders	0	0	1	1	0	0
7606100	Ladder-d a2	Ladders	1	1	1	1	1	0
471705	Ladder-d_a1	Ladders	2	5	0	1	2	1
7599503	Ladder-e a1	Ladders	2	0	10	0	0	0
7606070	Ladder-e a2	Ladders	0	0	2	4	0	0
8577316	Ladder-f a1	Ladders	0	0	10	4	0	0
7657358	Ladder-f a2	Ladders	0	1	6	5	1	0
17286081	Ladder(1)_t1	Ladders	0	3	0	0	0	0
5343539	Ladder(1)_t2	Ladders	0	6	0	0	0	0
7585631	Ladder(2)_t2	Ladders	0	0	12	0	0	1
17294442	Ladder(3)_t2	Ladders	2	0	8	1	0	0
20153309	Ladder(4)_t2	Ladders	0	4	0	0	0	0
16272893	A03 ipsilateral local_a1l		0	0	0	0	0	2
4480794	A03? ipsilateral local neuron a2r		0	0	0	0	4	1
7983032	A03?_a2r		0	0	0	0	1	0
15396750	A03b2_a3r		0	0	0	0	0	2
15535782	A03b2_a4l		0	0	0	0	0	1
3180525	A03o_a1r		0	1	0	0	0	0
7827470	A03xxx Ipsilateral mixed LN_a1l		0	0	0	0	0	3
6274400	A03xxx? a1r		0	0	0	0	3	3
6978347	A03xxx? a2l		0	0	0	0	5	0
10557507	A03xxx?_a2r		0	0	0	0	5	2
14046457	A05i?_a2r		0	0	0	0	1	0
21578189	A08?_a5l ascending neuron TODO dendrite		0	0	0	0	0	3
4839570	A08d_a1r		0	0	0	0	0	1
7747969	A08f a2r		0	0	0	0	0	1
255168	A08f a3l		0	0	0	3	0	0
12001789	A08f a3r		0	0	0	5	0	0
7977969	A08f a4r		0	0	0	4	1	0
12542019	A08f a5l		0	1	0	3	0	0
2436039	A08f a5r		0	0	0	2	0	0
11024782	A08h2_a2l (Jupiter left, not NB3-3)		0	0	2	0	0	2
4228864	A08h2_a2r (Jupiter right, not NB3-3)		0	1	1	0	0	1
21589151	A08j2? chunk with inputs from lch2/4 (ladder_a3/a4?)		0	0	4	0	0	0
14038118	A08y a3r gap axon		0	0	0	0	0	1
3220616	A09 Contra Brain Projection_a1l		0	0	0	0	0	1
3282869	A09b a1r Basin-1		0	0	0	1	0	0
4049878	A09c a1r Basin-4		0	0	0	1	0	0
749102	A09j?_a4r		1	0	0	0	0	0
17429419	A10j_a4l		0	1	0	0	0	0
5001606	A10j?_a2l		1	0	0	0	0	0
8603309	A10j?_t3r		0	0	1	0	0	0
14046464	A12b?_a1l		0	0	0	0	4	0
14046472	A12b?_a1r		0	0	0	0	2	0
1657277	A12h_a4l		0	1	10	4	0	0
1452290	A12h_a4r		0	0	12	0	0	0
14950365	A12l_a1r (not A12 lineage)		1	0	0	0	0	0
7478138	A12l_a3l		1	1	9	15	0	0
7533574	A12l_a3r putative		1	0	5	5	0	0
7553465	A12l_t2l		1	0	0	0	0	0
474609	A12y a1l		1	0	1	0	0	16
20253950	A12y a1r		0	0	2	0	0	11
7581474	A12y a2l		0	0	1	0	0	0
2982502	A12y a2r		0	1	0	0	0	3
10054666	A19x a1l		0	1	2	0	0	1
16330265	A19x a1r		0	0	0	1	0	0
8551220	A19x a3r		0	1	0	0	0	0
7752030	A19x? a2r		0	0	0	1	0	0
17269708	a23X_a1l		0	0	0	0	1	0
9747432	a23X_a1r		0	0	0	0	5	0
15352877	A26d_t3r_JMpair26		0	1	0	0	0	0
15292030	A27a t3l		0	0	0	0	3	1
6280989	A27a t3r		0	2	0	0	3	1
16066985	A27a_a1l		0	0	0	0	2	0
14046245	A27a_a1r		0	0	0	0	9	0
8257688	A27p a1r		0	0	0	0	0	1
16014834	A30x2/Drunken_a1r		0	0	0	0	1	0
3375053	a5l candidate to review and finish ascending		0	0	0	0	0	4
21589509	a5r ascending TODO dendrite		0	0	1	0	0	0
18912672	a8r ascending TODO dendrite		4	0	0	0	0	0
17608754	AN-L-Sens-B2-VM-07		0	0	0	0	0	1
16362243	AN-R-Sens-B2-VM-07		0	1	0	0	0	3
4059758	AN-R-Sens-B3-VM-15		0	8	0	0	0	0
18962403	ascending		0	0	0	0	0	2
2435352	ascending a7r		0	1	1	2	0	0
21585395	ascending from telson TODO dendrite		0	0	0	0	0	1
375628	Ascending neuron		0	0	0	0	0	1
21407953	ascending TODO dendrite		1	0	3	0	0	0
21645205	ascending TODO soma		0	0	0	0	0	2
15145176	At Gap		0	0	0	0	0	1
6214713	axon into gaps		0	0	0	0	1	0
16258094	center to ventral interneuron		0	0	0	0	1	0
16916273	contralateral lch5-1 PN t3l		2	0	0	0	0	2
9740415	contralateral lch5-1 PN t3r		1	0	0	0	0	0
1085197	descending ch-related peptidergic		2	0	0	0	1	0
4890222	descending pre-lch5 t2r a23i		0	0	0	0	2	0
6865190	difficult asecending gap axon		0	0	1	3	0	0
19767050	Drunken (undifferentiated, neuron 19767051)_a1r	Drunken	0	0	0	0	0	1
15115312	Drunken neuron 15115313_t3r	Drunken	0	0	0	0	0	4
18299121	drunken t3l	Drunken	0	0	0	0	0	1
6207232	Drunken-1 a1l	Drunken	0	1	1	1	0	8
4096366	Drunken-1 a1r	Drunken	0	1	0	1	0	9
5997132	drunken-1_a2l	Drunken	0	0	0	0	1	1
7668305	drunken-1_a2r	Drunken	0	0	0	0	0	2
10999160	duplicate neuron 10999161		1	0	0	0	0	0
7815876	flat LN t3l		0	0	0	0	3	0
3729051	follows Candidate 1 - 2		1	0	0	0	0	0
6214802	gap axon?		0	0	0	0	2	0
7195651	Griddle-1 a1l	Griddle	2	0	4	8	2	1
4824878	Griddle-1 a1r	Griddle	3	0	3	4	0	0
7616720	Griddle-1 a2l	Griddle	0	0	0	2	0	0
1066922	Griddle-1 a3l	Griddle	0	0	0	2	0	0
9867541	Griddle-1 t3l	Griddle	4	0	5	1	0	0
8045800	Griddle-1 t3r	Griddle	5	2	4	1	0	0
4177604	Griddle-1? a2r	Griddle	0	0	0	1	0	0
10804041	Griddle-2 a1l	Griddle	0	1	0	4	0	0
7683401	Griddle-2 a1r	Griddle	0	0	0	1	2	0
2661957	Griddle-2 a2l	Griddle	0	0	1	1	0	0
16310625	Griddle-2 t3l	Griddle	0	3	0	0	0	1
4305390	Griddle-2 t3r	Griddle	0	2	0	0	0	0
10937355	H-shaped_a1r		0	0	1	0	0	2
4022794	Handle-A a1		0	0	0	13	0	1
5527368	Handle-A a2		0	1	0	0	0	0
16208588	Handle-A t3		0	0	0	1	0	0
4321712	Handle-B a1		0	0	0	22	0	0
5881999	Handle-B a2		0	0	0	7	0	0
4995321	handle-B or C? t3		0	0	0	18	1	0
2123422	hook-1_a1l		3	0	2	0	0	1
2784471	hook-1_a1r		1	0	1	0	0	0
6263055	hook-2_a1l		1	0	0	0	1	0
6412532	hook-2_a1r		0	0	0	2	0	0
3863488	hook-2_a2r		0	0	0	0	0	2
2695223	hook-2_a3l		0	0	0	6	0	0
2042488	hook-2? t3l		0	0	0	0	0	1
20361774	Hook-2?_t3r		0	1	0	0	0	0
15287264	ipsilateral local neuron or A03xxx a2l		0	0	0	0	1	1
2664230	Jupiter A08h2 a3l		0	1	0	0	0	5
15560343	Jupiter A08h2 a3r (neuron 15560344)		1	0	0	0	0	6
2975521	Jupiter A08h2_a1l (A09_a1l)		7	0	0	0	0	4
2845449	lateral bundle axon terminal R ascending TODO dendrite		0	0	0	0	0	6
20180938	likely Griddle-1 t2r		0	0	2	0	0	0
15724520	MN-L-Sens-B3-VM-06		0	0	0	0	0	2
15638520	MN-R-Sens-B3-VM-06		0	0	0	0	0	6
15639275	MN-R-Sens-B3-VM-08		0	0	0	0	0	3
15671848	MN-R-Sens-B3-VM-09		0	0	0	0	0	1
10795972	neuron 10795973		0	1	0	0	0	0
1114207	neuron 1114208		0	0	0	0	1	0
11189276	neuron 11189277		0	0	1	0	0	0
11339492	neuron 11339493		0	0	0	0	0	1
1172922	neuron 1172923		1	0	0	0	0	0
1182440	neuron 1182441		0	0	0	0	0	1
12104842	neuron 12104843		0	0	0	0	0	1
12298112	neuron 12298113		0	0	0	1	0	0
12301207	neuron 12301208		0	0	0	0	0	1
12301647	neuron 12301648		0	0	0	0	0	1
12696411	neuron 12696412		0	0	0	0	0	1
12759053	neuron 12759054		0	1	0	0	0	0
12761083	neuron 12761084		0	1	0	0	0	0
12997940	neuron 12997941		0	0	0	1	0	0
12998061	neuron 12998062		0	0	0	1	0	0
13381399	neuron 13381400		0	0	0	1	0	0
13418381	neuron 13418382		0	0	0	1	0	0
13419622	neuron 13419623		0	0	0	1	0	0
13420446	neuron 13420447		0	0	0	1	0	0
14254128	neuron 14254129		0	0	0	0	0	1
14277688	neuron 14277689		0	3	0	0	0	0
15067782	neuron 15067783		0	0	1	0	0	0
1512437	neuron 1512438		0	0	1	0	0	0
15313762	neuron 15313763		0	1	0	0	0	0
15379002	neuron 15379003		0	0	0	0	0	1
15551116	neuron 15551117		0	0	0	0	0	1
15584937	neuron 15584938		1	0	0	0	0	1
15869266	neuron 15869267		0	0	2	0	4	0
15870246	neuron 15870247		1	3	0	0	0	0
16004167	neuron 16004168		0	0	0	0	0	1
16159849	Neuron 16159850		0	0	1	0	0	0
16216085	Neuron 16216086		0	0	0	1	0	0
16216101	neuron 16216102		0	0	0	0	1	0
16216147	neuron 16216148		0	0	0	0	1	0
16216287	neuron 16216288		0	0	0	0	1	0
16317705	neuron 16317706		0	0	0	1	0	0
16317993	neuron 16317994		0	0	0	1	0	0
16323784	neuron 16323785		0	0	0	1	0	0
16323798	neuron 16323799		0	0	0	1	0	0
16323818	neuron 16323819		0	0	0	1	0	0
16323842	neuron 16323843		0	0	0	1	0	0
16334247	neuron 16334248		0	0	0	1	0	0
16394629	neuron 16394630		0	0	1	0	0	0
16396958	neuron 16396959		0	0	0	0	0	1
16450236	neuron 16450237		0	1	0	0	0	0
16459060	neuron 16459061		0	0	0	0	0	1
16646458	neuron 16646459		0	0	0	0	0	2
16646476	neuron 16646477		0	0	0	0	0	1
16646489	neuron 16646490		0	0	0	0	0	1
16646651	neuron 16646652		0	0	0	0	0	1
16646678	neuron 16646679		0	0	0	0	0	1
16646903	neuron 16646904		0	1	0	0	0	1
16647039	neuron 16647040		0	0	0	0	0	1
16647070	neuron 16647071		0	0	0	0	0	1
16647148	neuron 16647149		0	0	0	0	0	1
16647395	neuron 16647396		0	0	0	0	0	1
16647569	neuron 16647570		0	0	0	0	0	1
16647663	neuron 16647664		0	0	0	0	0	1
16647681	neuron 16647682		0	0	0	0	0	1
16647944	neuron 16647945		0	0	0	0	0	1
16680395	neuron 16680396		0	0	0	0	1	0
16911492	neuron 16911493		0	1	0	0	0	0
16911543	neuron 16911544		0	1	0	0	0	0
16911784	neuron 16911785		0	1	0	0	0	0
16911843	neuron 16911844		0	1	0	0	0	0
16911856	neuron 16911857		0	1	0	0	0	0
16911889	neuron 16911890		0	1	0	0	0	0
16911956	neuron 16911957		0	1	0	0	0	0
16911969	neuron 16911970		0	1	0	0	0	0
16912009	neuron 16912010		0	1	0	0	0	0
16912092	neuron 16912093		0	1	0	0	0	0
16912143	neuron 16912144		0	1	0	0	0	0
16912198	neuron 16912199		0	1	0	0	0	0
16912212	neuron 16912213		0	1	0	0	0	0
16912235	neuron 16912236		0	1	0	0	0	0
16912260	neuron 16912261		0	1	0	0	0	0
16912328	neuron 16912330		0	1	0	0	0	0
16912372	neuron 16912373		0	1	0	0	0	0
16943527	neuron 16943528		0	1	0	0	0	0
16943552	neuron 16943553		0	1	0	0	0	0
17154403	Neuron 17154404		0	0	0	0	1	0
17157327	neuron 17157328		0	1	0	0	0	0
17157347	neuron 17157348		0	1	0	0	0	0
17157369	neuron 17157370		0	1	0	0	0	0
17157451	neuron 17157452		0	1	0	0	0	0
17157480	neuron 17157481		0	1	0	0	0	0
17157492	neuron 17157493		0	1	0	0	0	0
17157808	neuron 17157809		0	1	0	0	0	0
17221132	neuron 17221133		0	0	0	0	0	1
17221982	neuron 17221983		0	0	0	0	0	1
17222424	neuron 17222425		0	0	0	0	0	1
17222545	neuron 17222546		0	0	0	0	0	1
17269177	neuron 17269178		0	0	1	0	0	0
17283184	neuron 17283185		0	0	1	0	0	0
17283218	neuron 17283219		0	0	1	0	0	0
17286726	neuron 17286727		0	1	0	0	0	0
17287585	neuron 17287586		0	0	0	0	1	0
17287635	neuron 17287636		0	0	0	0	1	0
17290661	neuron 17290662		0	1	0	0	0	0
17290698	neuron 17290699		0	1	0	0	0	0
17290712	neuron 17290713		0	1	0	0	0	0
17291082	neuron 17291083		0	1	0	0	0	0
17291094	neuron 17291095		0	1	0	0	0	0
17291360	neuron 17291361		1	0	0	0	0	0
17291561	neuron 17291562		1	0	0	0	0	0
17291656	neuron 17291657		0	0	1	0	0	0
17291749	neuron 17291750		1	0	0	0	0	0
17291881	neuron 17291882		1	0	0	0	0	0
17295679	neuron 17295680		1	0	0	0	0	0
17295717	neuron 17295718		1	0	0	0	0	0
17750934	neuron 17750935		0	0	3	0	0	0
17786447	neuron 17786448		0	1	0	0	0	0
17806287	neuron 17806288		0	0	0	0	0	1
17806471	neuron 17806472		0	1	0	0	0	0
18152919	neuron 18152920_JMpair25		0	1	0	0	0	0
18404100	neuron 18404101		0	0	0	0	0	6
18981617	Neuron 18981618		0	0	1	0	0	0
18986021	neuron 18986022		0	0	0	0	1	0
19531146	neuron 19531147		0	1	0	0	0	0
19795267	neuron 19795268		0	0	0	0	0	1
20200348	neuron 20200349		0	2	0	0	0	1
20202159	neuron 20202160		0	3	0	0	0	0
20223165	Neuron 20223166		0	1	0	0	0	0
20253960	Neuron 20253961		0	0	1	0	0	0
20336301	Neuron 20336302		0	1	0	0	0	0
20374537	Neuron 20374538		0	0	2	0	0	0
20408097	neuron 20408098		0	0	0	0	0	2
20429207	neuron 20429208		0	0	0	1	0	0
20796381	neuron 20796382		0	1	0	0	0	0
20954570	Neuron 20954571		0	0	0	0	0	6
21598895	Neuron 21598896		3	0	0	0	0	0
21648990	neuron 21648991		0	0	0	3	0	0
21650157	Neuron 21650158		0	0	0	2	0	0
21650745	neuron 21650746		0	7	2	0	0	0
21650785	neuron 21650786		0	1	0	0	0	0
21651362	neuron 21651363		1	0	0	0	0	0
21652807	neuron 21652808		0	0	1	0	0	0
2279858	neuron 2279859		1	0	0	0	0	0
2818955	neuron 2818956		0	0	0	1	0	0
2827770	neuron 2827771		0	1	0	0	0	0
2904166	neuron 2904167		0	0	0	0	0	1
3306419	neuron 3306420		0	0	0	0	0	1
3685852	neuron 3685853		0	2	0	0	0	0
4041576	neuron 4041577		0	0	0	4	0	0
4046800	neuron 4046801		0	0	0	1	0	0
4061256	neuron 4061257		1	0	0	0	0	0
4176105	neuron 4176109		0	6	0	0	0	0
4177555	neuron 4177556		0	0	1	0	0	0
4179966	neuron 4179967		0	0	0	0	0	1
4194214	neuron 4194215		0	0	0	0	1	0
4416348	neuron 4416349		0	0	0	1	0	0
4419713	neuron 4419714		0	0	0	1	0	0
4584849	neuron 4584850		0	0	0	0	0	1
475268	neuron 475269		0	0	1	0	0	0
488762	neuron 488763		0	0	0	0	1	0
490902	neuron 490903		0	1	0	0	1	0
491126	neuron 491127		0	0	0	0	1	0
492521	neuron 492522		0	0	0	0	2	0
5034932	neuron 5034933		1	0	0	0	0	0
5235496	neuron 5235497		0	0	0	0	0	1
5239727	neuron 5239728		0	0	0	0	1	0
5728288	neuron 5728289		0	0	0	0	0	1
7150034	neuron 7150035		0	0	0	0	0	1
7184851	neuron 7184852		0	3	0	0	0	0
749837	neuron 749838		0	0	0	0	2	0
7534061	neuron 7534062		0	0	1	0	0	0
7534203	neuron 7534204		0	1	1	0	0	0
7536504	neuron 7536505		0	0	1	0	0	0
7542753	neuron 7542754		0	0	1	0	0	0
7548711	neuron 7548712		0	0	1	0	0	0
7548809	neuron 7548810		0	0	1	0	0	0
7550003	neuron 7550004		0	0	1	0	0	0
7557888	neuron 7557889		0	0	0	5	0	0
7581061	neuron 7581062		0	0	1	0	0	0
7582571	neuron 7582572		1	0	0	0	0	0
7597596	neuron 7597597		0	1	0	0	0	0
7597763	neuron 7597764		0	1	0	0	0	0
7598833	neuron 7598834		0	1	0	0	0	0
7598914	neuron 7598915		0	1	0	0	0	0
7602682	neuron 7602683		0	0	0	1	0	0
7604206	neuron 7604207		0	1	0	0	0	0
7604638	neuron 7604639		0	1	0	0	0	0
7604720	neuron 7604721		0	1	0	0	0	0
7605175	neuron 7605176		0	1	0	0	0	0
7605923	neuron 7605924		0	0	0	0	0	1
7618517	neuron 7618518		0	0	0	1	0	0
7643164	neuron 7643165		0	0	0	0	0	1
7659120	neuron 7659122		0	0	0	0	0	1
7661494	neuron 7661495		0	0	0	1	0	0
7695058	neuron 7695059		0	0	0	0	1	0
7695109	neuron 7695110		0	0	0	0	1	0
7697306	neuron 7697307		0	0	0	1	0	0
7697354	neuron 7697355		0	0	0	1	0	0
7727798	neuron 7727799		1	0	0	0	0	0
7728987	neuron 7728988		0	0	0	0	1	0
7782600	neuron 7782601		0	0	0	1	0	3
7782737	neuron 7782738		0	0	1	0	0	0
7822927	neuron 7822928		0	1	0	0	0	0
7900536	neuron 7900537		0	0	0	1	0	0
7939884	neuron 7939885		0	0	0	1	0	0
802134	neuron 802135		0	0	0	1	0	0
8216745	neuron 8216746		0	0	0	3	0	0
8618804	neuron 8618805		2	0	0	0	0	0
8662167	neuron 8662168		0	0	1	0	0	0
8737731	neuron 8737732 rev		0	0	0	0	1	0
9771105	neuron 9771106		0	0	0	0	0	2
9883354	neuron 9883355		0	0	0	0	1	0
9899363	neuron 9899364		0	0	0	1	0	0
16009971	neuron3 (not VLEL)_a1r		0	0	0	0	0	2
16004850	neuron3 (not VLEL)_a2l		0	0	0	0	0	1
15877900	neuron3 (not VLEL)_a2r		0	0	0	0	0	2
11579486	NOT a SN (lch5-3 PN a2l)		0	0	0	0	0	4
6446394	PDM-DN_left		0	0	0	0	0	1
5462159	PDM-DN_right		0	0	0	0	0	1
3650635	potential giraffe (descending)_L		2	0	1	0	0	0
20389937	potential potential giraffe (descending, Neuron 20389938)_R		1	0	6	0	0	1
7169795	potential potential giraffe 2 (descending, neuron 7169796)_R		1	0	1	0	0	1
7209768	revisit gap fragment		1	0	0	0	0	0
7551677	saddle-type neuron a1r		4	0	0	0	0	6
6240395	sens		0	0	0	0	1	0
16312897	sens		0	0	0	1	0	0
5304793	sensory-looking, but with soma_a3r		0	0	1	0	0	0
2986525	T06o t2l		0	1	7	1	0	1
2975298	T06o t2r		1	1	12	1	0	0
2847082	t10? t1r ventral soma left		0	0	1	0	0	0
8616397	t1l bilateral pre-lch5 descending neuron		2	1	0	0	0	0
21526083	t1l sensory ch es		0	3	0	0	0	9
4905931	t1r bilateral pre-lch5 descending neuron		1	0	0	0	0	1
10763004	T2 bilateral PN T2r		1	0	0	0	0	0
689215	t2l contralateral pre lch5		0	2	0	2	0	0
7699877	t2r contralateral pre lch5		0	1	0	1	0	1
7577188	t3 contralateral descending, identity lost to gap		0	0	0	0	3	0
17489678	t3r ascending TODO dendrite		0	0	0	0	0	2
5980603	t3r semi-medial soma ascending		0	0	0	0	0	1
7169767	telson PN to brain_a7l		0	0	3	0	0	0
2647140	telson PN to brain_a7r		0	0	5	0	0	1
