# Supplementary material for: Sequential addition of neuronal stem cell temporal cohorts generates a feed-forward circuit in the Drosophila larval nerve cord
Source: eLife. 2022 Jun 20;11:e79276. doi: 10.7554/eLife.79276 (PMC9333992; doi:10.7554/eLife.79276)
Supplement: Figure 10—source data 2. [file elife-79276-fig10-data2.xlsx]

## Sheet: Sheet1
	Ladder F	Ladder C	Ladder D	Ladder E	Ladder B	Ladder A
Ladder F	NaN	NaN	-3.86771	NaN	-4.69102	NaN
Ladder C	NaN	NaN	-2.9904	-2.47027	NaN	-2.92879
Ladder D	-3.86771	-2.9904	NaN	-3.67172	NaN	-3.6264
Ladder E	NaN	-2.47027	-3.67172	NaN	NaN	NaN
Ladder B	-4.69102	NaN	NaN	NaN	NaN	NaN
Ladder A	NaN	-2.92879	-3.6264	NaN	NaN	NaN
	Ladder F	Ladder C	Ladder D	Ladder E	Ladder B	Ladder A
