# Supplementary material for: Sequential addition of neuronal stem cell temporal cohorts generates a feed-forward circuit in the Drosophila larval nerve cord
Source: eLife. 2022 Jun 20;11:e79276. doi: 10.7554/eLife.79276 (PMC9333992; doi:10.7554/eLife.79276)
Supplement: Figure 13—source data 1. [file elife-79276-fig13-data1.xlsx]

## Sheet: Sheet1
Lineage	Percent of total
CHO	0.459459
Ladder	0.189189
EB EL	0.108108
NB3-5	0.108108
Other	0.135135
Birth time	Of all	Of only interneurons
Sensory neurons	0.459459
Later-born interneurons	0.378378	0.777778
Not later or unknown	0.162162	0.222222
