# Supplementary material for: Sequential addition of neuronal stem cell temporal cohorts generates a feed-forward circuit in the Drosophila larval nerve cord
Source: eLife. 2022 Jun 20;11:e79276. doi: 10.7554/eLife.79276 (PMC9333992; doi:10.7554/eLife.79276)
Supplement: Figure 14—source data 1. [file elife-79276-fig14-data1.xlsx]

## Sheet: Sheet1
New name	Old name on right	old names on left	NOTCH	LEFT	RIGHT	Average	Synapse onto early-born EL in A1?
		A03 (undiff, neuron 16272633)_a1l	OFF	11022		11022
		A03xxx Ipsilateral mixed LN_a1l	OFF	12883	24213	18548
A03t	neuron 12908464	A03 neuron 16112459_a1l	OFF	16389	15952	16170.5
A03xy	A03 neuron 15555304_doing_a1r	A03 neuron 16528101 with soma_a1l	OFF	16637	18183	17410
		A03 ipsilateral local_a1l	OFF	21108	27170	24139
		A03o_a1l	OFF	23988	23441	23714.5	yes
		A03 (upstream of A08m)_a1l	OFF	23988	27131	25559.5	yes
		A03d?_a1l	OFF	24388	14430	19409
		A03xyz_a1l	OFF	27121	23461	25291	yes
A08o1	A03 neuron 16042114_a1r	A03 neuron 4313312 (ad)_a1l	OFF	27484	28534	28009	yes
		A03p_a1l	ON	6576		6576
A03a5	neuron 10515200 with a soma_doing	A03?_a1l	ON	8308	6325	7316.5
A03XXX pre motor	neuron 10461748 A03? pre-motor	A03XXX pre motor_a1l	ON	11528	14065	12796.5
A03_post_A02k	A03 neuron 9545311_doing_a1r	A03?_post_A02k_a1l	ON	12877	11017	11947
A03x	A03?_a2r	A03x1_a1l	ON	13729	13036	13382.5
A03ax	A03?2_a2r	A03ax_a1l	ON	15960	26662	21311
		A03x_a1l	ON	16662		16662
		a03d/e_a1l	ON	19070	19884	19477
		A03j?_a1l (premotor)	ON	19394		19394
		A03EGB_a2l (EGHBAL)	ON	20867	26031	23449
	A03a1_a2r	A03a1_a1l	ON	21042	18912	19977
		A03 neuron 12915194 undiff_a1l	ON	26672		26672
		A03a4_a1l	ON	26906	19482	23194
		A03_preA08m_a1l	ON	28147	22773	25460
	A03x_a1l shab	A03x_a1l shab	ON	29232	21414	25323
