# Supplementary material for: Sequential addition of neuronal stem cell temporal cohorts generates a feed-forward circuit in the Drosophila larval nerve cord
Source: eLife. 2022 Jun 20;11:e79276. doi: 10.7554/eLife.79276 (PMC9333992; doi:10.7554/eLife.79276)
Supplement: Supplementary file 2. — With following tabs: All sensory neuron and interneuron inputs onto early-born ELs (Figure 6E). Summary (Figure 6EB). Inputs onto early-born ELs (Figure 6B). Input onto each early-born EL (Figure 7B–D). [file elife-79276-supp2.xlsx]

## Sheet: IN and SN to earlyborn ELs 
							Synapse number onto early-born EL
SKELETON ID	Neuron Name	Name used in this study	Type	Category	Linage assignment	Confrimation	A08x A1L	A08x A1R	A08j1 A1L	A08j1 A1R	A08j3 A1L	A08j3 A1R	A08j2 A1L	A08j2 A1R	A08m A1L	A08m A1R			sum
21236084	A??_a7r ascending TODO dendrite		Interneuron				0	0	0	0	0	0	0	0	1	0			1
16009795	A??_a8r ascending TODO dendrites		Interneuron				0	1	0	0	0	0	0	0	0	0			1
2511238	A00c_a4l		Interneuron				0	0	0	0	1	0	0	0	0	0			1
16531827	A03 (upstream of A08m)_a1l		Interneuron		NB7-1	Yes	0	0	0	6	0	0	0	4	0	0			10
16042066	A03 (upstream of A08m)_a1r		Interneuron		NB7-1	Yes	0	0	8	0	0	0	0	0	0	0			8
16042113	A03 neuron 16042114_a1r		Interneuron		NB7-1	Yes	0	0	1	0	0	0	0	0	0	0			1
4313311	A03 neuron 4313312 (ad)_a1l		Interneuron		NB7-1	Yes	0	0	0	1	0	0	0	0	0	0			1
7983032	A03?_a2r		Interneuron		NB7-1	No	0	0	0	1	0	0	0	0	0	0			1
15535782	A03b2_a4l		Interneuron		NB7-1	No	0	0	0	0	0	0	0	0	0	1			1
4302562	A03o_a1l		Interneuron		NB7-1	Yes	0	1	0	4	0	1	0	0	2	0			8
3180525	A03o_a1r		Interneuron		NB7-1	Yes	0	0	7	0	0	0	0	0	0	0			7
4054001	A03o_a2r		Interneuron		NB7-1	Yes	0	0	4	0	0	0	0	0	0	0			4
4092957	A03o_a3l		Interneuron		NB7-1	Yes	1	0	0	0	0	0	0	0	0	0			1
4720352	A03xyz a2l		Interneuron		NB7-1	Yes	0	1	0	0	0	0	0	0	0	0			1
4039711	A03xyz_a1l		Interneuron		NB7-1	Yes	0	4	0	0	0	0	0	0	3	1			8
4538613	A03xyz_a1r		Interneuron		NB7-1	Yes	0	0	3	0	0	0	0	0	0	0			3
8644484	A05g_a1l? lch projection neuron bilateral dendrites a1l		Interneuron				0	0	0	0	0	0	1	0	0	0			1
13775497	A06k_a1r		Interneuron				0	0	0	0	0	0	0	1	0	0			1
16337850	A07d_a1l		Interneuron				0	0	1	0	0	0	0	0	0	0			1
4975387	A08d_a1l		Interneuron				0	0	0	0	1	0	0	0	0	0			1
12233573	A08f a2l		Interneuron				0	0	0	0	1	0	0	0	0	0			1
255168	A08f a3l		Interneuron				0	0	0	0	1	0	0	0	0	0			1
12001789	A08f a3r		Interneuron				0	0	0	0	0	1	0	0	0	0			1
11024782	A08h2_a2l (Jupiter left, not NB3-3)		Interneuron		NB3-5	No	3	0	0	0	0	0	0	0	2	1			6
4228864	A08h2_a2r (Jupiter right, not NB3-3)		Interneuron		NB3-5	No	0	4	0	0	0	0	0	0	1	4			9
4628271	A08h4b_a2l		Interneuron	Early-Born EL	NB3-3	Yes	0	0	0	0	0	1	0	0	0	0			1
8057753	A08j2_a1l	A08j2	Interneuron	Early-Born EL	NB3-3	Yes	0	0	0	1	5	3	0	3	0	0			12
10949030	A08j2_a1r	A08j2	Interneuron	Early-Born EL	NB3-3	Yes	0	2	0	0	7	2	1	0	0	0			12
8602741	A08j2_a2l	A08lg	Interneuron	Early-Born EL	NB3-3	Yes	0	0	0	0	2	1	2	2	0	0			7
19310779	A08j2_a2r	A08lg	Interneuron	Early-Born EL	NB3-3	Yes	0	0	0	1	7	5	12	1	0	0			26
20072902	A08j2?_a4r		Interneuron		NB3-3	No	0	0	0	0	0	0	1	0	0	0			1
12393624	A08m2? a3r		Interneuron		NB3-3	No	0	0	0	0	0	1	0	0	0	0			1
7880001	A08o_a1r	A08o	Interneuron	Early-Born EL	NB3-3	Yes	0	0	0	0	0	0	0	2	0	0			2
20438424	A08v_a3l		Interneuron	Early-Born EL	NB3-3	Yes	5	0	0	0	0	0	3	0	0	0			8
6246099	A08v_a3r		Interneuron	Early-Born EL	NB3-3	Yes	1	0	0	0	0	0	1	2	0	0			4
7185469	A08v_t2l		Interneuron	Early-Born EL	NB3-3	Yes	16	7	0	0	0	0	0	0	0	0			23
6202481	A08v_t2r		Interneuron	Early-Born EL	NB3-3	Yes	0	23	0	0	0	0	0	0	0	0			23
3029998	A08v?_a4l		Interneuron	Early-Born EL	NB3-3	Yes	4	0	0	0	0	0	0	0	0	0			4
7827759	A08v?_a4r		Interneuron	Early-Born EL	NB3-3	Yes	0	2	0	0	1	0	0	1	0	0			4
5343578	A08x_a1l	A08x	Interneuron	Early-Born EL	NB3-3	Yes	0	0	0	0	2	2	0	0	2	0			6
7184082	A08x_a1r	A08x	Interneuron	Early-Born EL	NB3-3	Yes	1	0	0	0	1	0	0	1	3	0			6
3220616	A09 Contra Brain Projection_a1l	ContraBrain	Interneuron		NB3-5	No	0	0	0	0	2	1	0	0	0	0			3
16278312	A09 Contra Brain Projection_a1r	ContraBrain	Interneuron		NB3-5	No	1	0	0	0	2	2	0	0	0	0			5
8803134	A09 dorsal drunken_a3r		Interneuron		NB3-5	No	0	0	0	0	1	0	0	0	0	0			1
15983385	A09 drunken-maybe4?_a3l		Interneuron		NB3-5	No	0	0	0	0	0	1	0	0	0	0			1
3104252	A09?_a3r Basin-3		Interneuron	Basin	NB3-5	Yes	0	0	0	0	0	0	0	0	1	0			1
3074106	A09a a1r Basin-2	Basin 2	Interneuron	Basin	NB3-5	Yes	0	0	0	0	0	0	0	0	1	0			1
3425777	A09a Basin-2 t3l		Interneuron	Basin	NB3-5	Yes	1	5	0	0	0	0	0	0	0	6			12
4598201	A09a Basin-2 t3r		Interneuron	Basin	NB3-5	Yes	9	1	0	0	0	0	0	0	2	0			12
5114804	A09a_a2r Basin-2		Interneuron	Basin	NB3-5	Yes	1	0	0	0	0	0	0	0	1	0			2
3034133	A09b a1l Basin-1	Basin 1	Interneuron	Basin	NB3-5	Yes	1	10	0	0	0	0	0	0	0	7			18
3282869	A09b a1r Basin-1	Basin 1	Interneuron	Basin	NB3-5	Yes	9	4	0	0	0	0	0	0	7	0			20
3043553	A09b Basin-1 a2l		Interneuron	Basin	NB3-5	Yes	1	7	0	0	0	0	0	0	0	7			15
3278999	A09b Basin-1 a2r		Interneuron	Basin	NB3-5	Yes	3	1	0	0	0	0	0	0	2	0			6
10272672	A09b_t3r Basin-4		Interneuron	Basin	NB3-5	Yes	0	0	0	0	0	0	0	0	1	0			1
3040481	A09c a1l Basin-4	Basin 4	Interneuron	Basin	NB3-5	Yes	0	0	0	0	0	0	0	0	0	1			1
4049878	A09c a1r Basin-4	Basin 4	Interneuron	Basin	NB3-5	Yes	1	2	0	0	0	0	0	0	3	0			6
3065790	A09c Basin-4 a2l		Interneuron	Basin	NB3-5	Yes	0	0	0	0	0	0	0	0	0	2			2
3279737	A09c Basin-4 a2r		Interneuron	Basin	NB3-5	Yes	2	2	0	0	0	0	0	0	0	0			4
3426634	A09c_t3l Basin-4?		Interneuron	Basin	NB3-5	Yes	0	0	0	0	0	0	0	0	0	2			2
5182902	A09c_t3r Basin-4?		Interneuron	Basin	NB3-5	Yes	2	0	0	0	0	0	0	0	4	0			6
10179501	A09g a1l Basin-3	Basin 3	Interneuron	Basin	NB3-5	Yes	0	0	0	0	0	0	0	0	0	4			4
3091943	A09g a1r Basin-3	Basin 3	Interneuron	Basin	NB3-5	Yes	0	0	0	0	0	0	0	0	2	0			2
3176470	A09g a2l Basin-3		Interneuron	Basin	NB3-5	Yes	1	0	0	0	0	0	0	0	1	0			2
3067750	A09g a2l Basin-3		Interneuron	Basin	NB3-5	Yes	0	0	0	0	0	0	0	0	0	1			1
3241605	A09j_a3l		Interneuron		NB3-5	No	2	0	2	0	0	0	0	0	0	0			4
	A09j_a3r		Interneuron		NB3-5	No	0	1	0	0	0	0	0	0	0	0		XX	1
749102	A09j?_a4r		Interneuron		NB3-5	No	1	0	0	0	0	0	0	0	0	0			1
10273349	A0Xp?_a1r		Interneuron		NB3-5	No	0	0	0	0	0	0	0	1	0	0			1
9791965	A10? a1r		Interneuron		NB2-2	No	0	0	0	4	0	0	0	0	0	0			4
16490572	A10? neuron 16490572_a1l		Interneuron		NB2-2	No	0	0	3	0	0	0	0	0	0	0			3
21250110	A10j_a1l		Interneuron		NB2-2	No	1	0	0	0	0	0	0	0	0	0			1
9640873	A10j_a1r		Interneuron		NB2-2	No	0	0	0	2	0	0	0	0	0	0			2
9354613	A10j_a3l		Interneuron		NB2-2	No	1	0	4	0	0	0	0	0	2	1			8
4163234	A10j_a3r		Interneuron		NB2-2	No	0	0	0	10	0	0	0	0	0	0			10
17429419	A10j_a4l		Interneuron		NB2-2	No	0	0	6	0	0	0	0	0	0	0			6
4380751	A10j_a4r		Interneuron		NB6-1	No	1	0	0	4	0	0	0	0	0	0			5
4468632	A10j?_a2r		Interneuron		NB2-2	No	0	0	0	2	0	0	0	0	0	1			3
17429637	A10j?_a5l		Interneuron		NB2-2	No	0	0	2	0	0	0	0	0	0	0			2
8603309	A10j?_t3r		Interneuron		NB2-2	No	0	0	0	0	0	0	0	0	1	0			1
1657277	A12h_a4l	>10	Interneuron		NB6-1	No	0	0	1	0	4	1	0	0	23	14			43
1452290	A12h_a4r		Interneuron		NB6-1	No	1	2	0	0	1	3	0	0	7	26			40
14950365	A12l_a1r (not A12 lineage)		Interneuron		NB6-2	No	0	1	0	0	0	3	0	0	1	0			5
7478138	A12l_a3l		Interneuron		NB6-1	No	1	0	0	0	1	0	0	2	0	0			4
7533574	A12l_a3r putative		Interneuron		NB6-1	No	5	1	0	0	0	0	0	0	1	0			7
5662837	A12l?		Interneuron		NB6-1	No	1	0	0	0	0	0	0	2	0	0			3
474609	A12y a1l		Interneuron		NB6-1	No	0	0	0	0	0	0	0	0	1	1			2
20253950	A12y a1r		Interneuron		NB6-1	No	3	0	0	0	0	0	0	0	2	1			6
7581474	A12y a2l		Interneuron		NB6-1	No	0	0	0	0	0	0	1	0	0	0			1
5177091	A18 t3? dentrites close to MDNs		Interneuron		NB2-4	No	0	0	6	0	0	0	0	0	0	0			6
10054666	A19x a1l		Interneuron		NB6-2	No	0	1	0	1	1	1	0	0	0	0			4
16330265	A19x a1r		Interneuron		NB6-2	No	0	0	0	0	2	0	0	0	1	0			3
8551220	A19x a3r		Interneuron		NB6-2	No	3	1	0	0	0	0	0	0	0	1			5
4384461	A19x? a3l		Interneuron		NB6-2	No	0	0	0	1	2	1	0	0	0	0			4
6214126	A19x? a4l		Interneuron		NB6-2	No	2	1	0	0	0	0	0	0	0	0			3
2743423	A23i_a2l		Interneuron		NB7-4	No	0	2	0	0	0	0	0	0	0	0			2
16232415	A26d_t3l_JMpair26		Interneuron				0	0	1	0	0	0	0	0	0	0			1
15352877	A26d_t3r_JMpair26		Interneuron				0	0	0	1	0	0	0	0	0	0			1
3375053	a5l candidate to review and finish ascending		Interneuron				0	0	0	0	3	1	0	0	1	0			5
2435352	ascending a7r		Interneuron				0	0	0	0	3	1	0	0	1	0			5
15145176	At Gap		Interneuron				0	0	0	0	0	0	0	0	2	0			2
7170596	attach to locked A09b alr Basin-1 on slice 2261__neuron 7170597		Interneuron				0	0	1	0	0	0	0	0	0	0			1
4021977	basin axon fragment		Interneuron		NB3-5	No	0	0	0	2	0	1	0	0	0	0			3
1555284	Basin-1_a3r		Interneuron	Basin	NB3-5	Yes	2	1	0	0	0	0	0	0	2	0			5
4071445	basin-4 axon fragment		Interneuron		NB3-5	No	0	0	0	1	0	0	0	0	0	0			1
5740765	basin/basket starter_t2r		Interneuron		NB3-5	No	0	0	1	0	0	0	0	0	0	0			1
5369632	basket-4 t2r		Interneuron				0	0	3	0	1	1	0	0	0	0			5
6872170	basket-4? t1r		Interneuron				0	0	0	0	0	2	0	0	0	0			2
16258094	center to ventral interneuron		Interneuron				0	0	0	1	0	0	0	0	0	0			1
2404677	Continuations At Gap		Interneuron				0	2	0	0	0	0	0	0	0	0			2
16916273	contralateral lch5-1 PN t3l		Interneuron		NB7-1	No	1	0	0	0	0	0	0	0	2	0			3
9740415	contralateral lch5-1 PN t3r		Interneuron		NB7-1	No	1	0	0	0	0	3	0	0	0	1			5
3049794	contralateral thoracic		Interneuron				0	0	0	0	1	3	0	0	0	0			4
10105382	descending pre-lch5 t2l		Interneuron				1	0	0	0	0	0	0	0	0	0			1
6865190	difficult asecending gap axon		Interneuron				0	0	0	0	3	2	0	0	0	0			5
5741431	difficult axon		Interneuron				0	0	0	0	0	1	0	0	0	0			1
4216155	dorsal drunken a2r		Interneuron		NB3-5	No	0	0	0	0	0	1	0	0	0	0			1
10047009	dorsal drunken t3l		Interneuron		NB3-5	No	0	0	0	1	0	0	0	0	0	0			1
5128837	dorsal drunken t3r		Interneuron		NB3-5	No	0	0	0	0	1	0	0	0	0	0			1
4215757	drunken-? a2r		Interneuron		NB3-5	No	0	0	2	0	3	2	0	0	0	0			7
5271796	drunken-? a3r		Interneuron		NB3-5	No	0	0	2	0	4	0	0	0	0	0			6
6207232	Drunken-1 a1l		Interneuron		NB3-5	No	0	0	1	0	0	0	0	0	0	0			1
4096366	Drunken-1 a1r		Interneuron		NB3-5	No	0	0	3	0	0	1	0	0	0	0			4
173190	drunken-1_a4r		Interneuron		NB3-5	No	0	1	0	0	0	0	0	0	0	0			1
2412399	Easier Gap Crossing		Interneuron				0	2	0	0	0	0	0	0	0	0			2
16310630	Griddle lineage t3l		Interneuron		NB6-2	No	0	0	0	0	2	1	0	0	0	0			3
7195651	Griddle-1 a1l		Interneuron		NB6-2	No	1	0	0	0	0	0	0	0	0	1			2
1066922	Griddle-1 a3l		Interneuron		NB6-2	No	1	0	0	0	0	0	0	0	0	0			1
9867541	Griddle-1 t3l		Interneuron		NB6-2	No	0	1	0	0	0	0	0	0	0	0			1
8045800	Griddle-1 t3r		Interneuron		NB6-2	No	1	0	0	0	0	0	0	0	0	3			4
7208855	Griddle-1? t2l		Interneuron		NB6-2	No	0	0	0	0	1	0	0	0	0	0			1
6321869	Griddle-2 (A19) something t3r		Interneuron		NB6-2	No	0	0	0	0	1	4	0	0	0	0			5
10804041	Griddle-2 a1l		Interneuron		NB6-2	No	0	0	0	3	0	0	0	0	1	0			4
7683401	Griddle-2 a1r		Interneuron		NB6-2	No	1	0	0	0	0	0	0	0	0	0			1
2661957	Griddle-2 a2l		Interneuron		NB6-2	No	3	0	0	0	0	0	0	0	2	0			5
16310625	Griddle-2 t3l		Interneuron		NB6-2	No	0	0	0	1	0	2	0	0	0	0			3
4305390	Griddle-2 t3r		Interneuron		NB6-2	No	0	0	1	0	0	0	0	0	0	0			1
6549756	griddle-like t2l		Interneuron		NB6-2	No	0	0	0	0	0	1	0	0	0	0			1
7766016	H-shaped _a1l		Interneuron		MP	No	0	0	0	0	0	0	0	0	2	3			5
10937355	H-shaped_a1r		Interneuron		MP	No	0	0	0	0	0	1	0	0	4	1			6
2562054	Handle a3 (neuron 2562055)		Interneuron		MP	No	0	1	0	0	0	0	0	0	0	0			1
4321712	Handle-B a1		Interneuron		MP	No	0	0	0	0	0	1	0	0	1	0			2
5881999	Handle-B a2		Interneuron		MP	No	0	0	0	0	0	0	0	0	1	0			1
2123422	hook-1_a1l		Interneuron		NB1-2	No	2	0	0	0	0	0	6	2	1	1			12
2784471	hook-1_a1r		Interneuron		NB1-2	No	1	0	0	0	0	0	4	2	1	0			8
2763260	hook-1_a2r		Interneuron		NB1-2	No	0	0	0	0	0	0	1	0	1	0			2
6263055	hook-2_a1l		Interneuron		NB1-2	No	0	0	0	0	0	2	0	0	0	0			2
6412532	hook-2_a1r		Interneuron		NB1-2	No	0	0	0	0	2	0	0	0	0	0			2
2743404	hook-2_a2l		Interneuron		NB1-2	No	0	1	0	0	0	1	0	0	0	0			2
3863488	hook-2_a2r		Interneuron		NB1-2	No	0	0	0	0	1	0	0	0	0	0			1
2788567	hook-3_a4l		Interneuron		NB1-2	No	1	0	0	0	0	0	0	0	0	0			1
12874044	JaamXX A12f_a1l		Interneuron		NB5-2	No	0	0	1	0	0	0	0	0	0	0			1
2664230	Jupiter A08h2 a3l		Interneuron		NB3-5	No	0	0	0	0	0	1	0	0	0	2			3
15560343	Jupiter A08h2 a3r (neuron 15560344)		Interneuron		NB3-5	No	1	0	0	0	0	0	0	0	5	0			6
2975521	Jupiter A08h2_a1l (A09_a1l)		Interneuron		NB3-5	No	1	0	0	0	1	0	0	0	1	0			3
16949	ladder with post T at 4208		Interneuron	ladder	MNB	Yes	0	0	0	0	0	0	0	1	0	0			1
17200057	Ladder_(neuron 17200058)_a3		Interneuron	ladder	MNB	Yes	0	0	0	0	0	0	3	0	0	0			3
18405380	Ladder_(neuron 18405381)_a5		Interneuron	ladder	MNB	Yes	0	0	5	0	0	0	0	0	0	0			5
20305415	Ladder_(neuron 20305416)_a5		Interneuron	ladder	MNB	Yes	0	0	2	2	0	0	0	3	0	0			7
4595569	Ladder_(neuron 4595570)_a3		Interneuron	ladder	MNB	Yes	0	0	13	6	2	0	5	3	0	0			29
2667974	Ladder_(post lch5-2/4)_a3		Interneuron	ladder	MNB	Yes	0	0	2	1	0	1	4	3	0	0			11
4913256	Ladder_(pre-lch5-3 axon)_a3		Interneuron	ladder	MNB	Yes	0	0	0	0	0	0	0	1	0	0			1
16221632	Ladder_a7		Interneuron	ladder	MNB	Yes	1	0	0	0	0	0	0	0	0	0			1
14535	Ladder_t1 with post T at 1637 (thoracic)		Interneuron	ladder	MNB	Yes	0	1	0	0	8	4	3	1	0	0			17
4942150	Ladder_t1u		Interneuron	ladder	MNB	Yes	3	0	0	0	2	2	5	4	0	0			16
4933586	Ladder_t3 max_descending		Interneuron	ladder	MNB	Yes	1	0	0	0	0	0	2	1	0	0			4
20306340	Ladder_t3r mid_descending		Interneuron	ladder	MNB	Yes	10	2	0	0	19	16	2	0	0	0			49
11995	Ladder-a_a1	Ladder A	Interneuron	ladder	MNB	Yes	1	1	0	0	1	0	0	0	0	0			3
8614658	Ladder-a_t3l		Interneuron	ladder	MNB	Yes	3	2	0	0	2	3	4	1	0	1			16
2429370	Ladder-b_a3		Interneuron	ladder	MNB	Yes	0	0	2	0	0	0	0	0	0	0			2
160708	Ladder-b_t3		Interneuron	ladder	MNB	Yes	0	3	0	0	0	0	0	0	0	0			3
471720	Ladder-c a1	Ladder C	Interneuron	ladder	MNB	Yes	0	0	1	0	0	0	0	0	0	1			2
7606126	Ladder-c a2		Interneuron	ladder	MNB	Yes	0	0	0	2	0	0	0	0	0	0			2
7606100	Ladder-d a2		Interneuron	ladder	MNB	Yes	0	0	2	3	2	1	3	2	0	0			13
471705	Ladder-d_a1	Ladder D	Interneuron	ladder	MNB	Yes	1	0	10	3	0	3	3	1	0	0			21
788359	Ladder-d_a4		Interneuron	ladder	MNB	Yes	0	0	10	1	0	0	0	0	0	0			11
7599503	Ladder-e a1	Ladder E	Interneuron	ladder	MNB	Yes	0	0	0	0	0	0	1	1	0	1			3
7606070	Ladder-e a2		Interneuron	ladder	MNB	Yes	0	0	0	1	0	1	4	4	0	0			10
8577316	Ladder-f a1	Ladder F	Interneuron	ladder	MNB	Yes	1	2	0	0	8	12	3	2	0	0			28
7657358	Ladder-f a2		Interneuron	ladder	MNB	Yes	0	0	0	0	4	5	2	4	0	0			15
15258	Ladder? with post T at 1360 (sog?)		Interneuron		MNB	No	0	1	0	0	0	0	0	0	1	0			2
20286306	Ladder?_(neuron 20286307)_a6		Interneuron	ladder	MNB	Yes	0	0	0	0	0	0	0	1	0	0			1
20928045	Ladder(1)_a4		Interneuron	ladder	MNB	Yes	0	0	0	0	0	0	1	0	0	0			1
17286081	Ladder(1)_t1		Interneuron	ladder	MNB	Yes	1	2	0	0	0	0	0	0	0	0			3
5343539	Ladder(1)_t2		Interneuron	ladder	MNB	Yes	2	3	0	0	0	0	0	0	0	0			5
2375	Ladder(2)_a4		Interneuron	ladder	MNB	Yes	0	0	0	0	0	0	0	1	0	0			1
7585631	Ladder(2)_t2		Interneuron	ladder	MNB	Yes	4	0	0	0	13	8	3	1	0	0			29
17294442	Ladder(3)_t2		Interneuron	ladder	MNB	Yes	3	4	0	0	2	0	4	2	0	0			15
1295146	lch5_a5r (sensory neuron 1295147)		Sensory	CHO			0	0	2	0	0	0	0	0	0	0			2
196616	lch5-1_a4l		Sensory	CHO			0	0	0	0	0	0	0	2	0	0			2
309781	lch5-1_a5l		Sensory	CHO			0	0	0	0	0	0	0	1	0	0			1
7551402	lch5-1_t3r		Sensory	CHO			0	2	0	0	0	0	0	0	1	0			3
7208962	lch5-1ish_t2l (neuron 720896)		Sensory	CHO			1	0	0	0	0	0	0	0	0	0			1
7418771	lch5-2/4 ?		Sensory	CHO			0	0	3	1	0	2	0	0	0	0			6
162293	lch5-2/4 a1l		Sensory	CHO			0	0	1	4	2	2	0	0	0	1			10
159280	lch5-2/4 a1l		Sensory	CHO			0	0	3	3	1	0	0	0	0	3			10
6276557	lch5-2/4 a1r		Sensory	CHO			0	0	5	5	1	1	0	0	0	0			12
7577773	lch5-2/4 a1r		Sensory	CHO			0	0	1	3	0	2	0	0	0	0			6
2792430	lch5-2/4 a2l		Sensory	CHO			0	0	2	3	0	1	0	0	0	0			6
14966464	lch5-2/4 a2l		Sensory	CHO			0	0	5	1	0	0	0	0	0	0			6
15608857	lch5-2/4 a2r		Sensory	CHO			0	0	1	1	0	2	0	0	0	0			4
7577083	lch5-2/4 a2r		Sensory	CHO			0	0	0	2	0	0	0	0	0	0			2
769563	lch5-2/4_a3l		Sensory	CHO			0	0	17	5	2	2	0	0	0	0			26
7498606	lch5-2/4_a3r		Sensory	CHO			0	0	5	0	0	1	0	0	0	0			6
7472862	lch5-2/4_a3r		Sensory	CHO			0	0	4	0	0	0	0	0	0	0			4
131382	lch5-2/4_a4l		Sensory	CHO			0	0	6	7	3	0	0	0	0	0			16
218296	lch5-2/4_a4l		Sensory	CHO			0	0	5	2	1	0	2	0	0	0			10
819698	lch5-2/4_a4r		Sensory	CHO			0	0	8	5	1	2	0	0	0	0			16
20308532	lch5-2/4_a4r		Sensory	CHO			0	0	4	2	3	0	0	0	0	0			9
115880	lch5-2/4_a5l		Sensory	CHO			0	0	9	5	2	3	0	0	0	0			19
11023891	lch5-2/4_a5l		Sensory	CHO			0	0	3	0	2	3	0	0	0	0			8
2282599	lch5-2/4_a5r (sensory neuron 2282600)		Sensory	CHO			0	0	5	3	2	3	0	0	0	0			13
230801	lch5-2/4_a6l		Sensory	CHO			0	0	10	4	0	0	0	0	0	0			14
830870	lch5-2/4_a6l		Sensory	CHO			0	0	11	3	0	0	0	0	0	0			14
2342719	lch5-2/4_a6r		Sensory	CHO			0	0	7	4	3	1	0	0	0	0			15
145480	lch5-2/4_a7l		Sensory	CHO			0	0	9	2	2	1	0	0	0	0			14
2349558	lch5-2/4_a7r		Sensory	CHO			0	0	2	0	1	5	0	0	0	0			8
2820201	lch5-2/4_a7r (sensory neuron 2820202)		Sensory	CHO			0	0	5	4	2	4	0	0	0	0			15
11044044	lch5-2/4_a8/9l		Sensory	CHO			0	0	19	3	7	4	0	0	0	0			33
20295083	lch5-2/4_a8/9r		Sensory	CHO			0	0	8	14	3	11	0	0	0	0			36
11023963	lch5-2/4_a8l		Sensory	CHO			0	0	5	4	0	0	0	0	0	0			9
2294672	lch5-2/4_a8l (bundles with)		Sensory	CHO			0	0	2	2	0	1	0	0	0	0			5
928405	lch5-2/4_a9r (bundles with)		Sensory	CHO			0	0	1	0	0	0	0	0	0	0			1
1113488	lch5-2/4_contra_projection VLEL9_t3l	A08cc	Interneuron	Early-Born EL	NB3-3	Yes	0	0	10	4	3	0	2	0	0	0			19
3586415	lch5-2/4_l unknown		Sensory	CHO			0	0	1	5	1	3	0	0	0	0			10
15560552	lch5-2/4_r unknown		Sensory	CHO			0	0	7	11	1	4	0	0	0	0			23
1171920	lch5-2/4_t1l? sensory neuron 1171921		Sensory	CHO			0	0	8	0	0	0	0	0	0	0			8
7534835	lch5-2/4_t1r (sensory neuron 7534836)		Sensory	CHO			0	0	0	2	0	2	1	0	0	0			5
15870533	lch5-2/4_t2l (neuron 15870533)		Sensory	CHO			0	0	9	1	0	0	3	0	0	0			13
15870382	lch5-2/4_t2l (sensory neuron 15870383)		Sensory	CHO			0	0	6	0	0	0	3	0	0	0			9
7576854	lch5-2/4_t2r		Sensory	CHO			0	0	15	0	0	0	0	0	0	0			15
20295030	lch5-2/4_t2r (sensory neuron 20295031)		Sensory	CHO			0	0	0	6	0	2	0	0	0	0			8
17277897	lch5-2/4_t3l (sensory neuron 17277898)		Sensory	CHO			0	0	1	0	0	0	0	0	0	2			3
2294761	lch5-2/4? putative		Sensory	CHO			0	0	3	2	1	1	0	0	0	0			7
17644150	lch5-2/4? sensory_a9r (neuron 17644151)		Sensory	CHO			0	0	0	0	0	0	6	4	0	0			10
2226852	lch5-24_contra_projection VLEL9_t3r	A08cc	Interneuron	Early-Born EL	NB3-3	Yes	0	1	0	4	2	4	0	2	0	0			13
7476448	lch5-2ish_t3r		Sensory	CHO			0	0	0	4	0	0	0	0	0	0			4
8031834	lch5-3 a1l		Sensory	CHO			0	0	0	0	1	1	0	0	0	1			3
15577519	lch5-3 a2r		Sensory	CHO			0	0	0	0	0	1	0	0	0	0			1
207983	lch5-3_a4l		Sensory	CHO			0	0	0	0	0	0	0	2	0	0			2
309974	lch5-3_a5r		Sensory	CHO			0	0	0	0	0	0	0	4	0	0			4
927468	lch5-3_a9r (bundles with)		Sensory	CHO			0	0	0	0	0	0	0	7	0	0			7
19293747	lch5-3?_a6l (sensory neuron 19293748)		Sensory	CHO			0	0	0	0	0	0	0	6	0	0			6
6753438	lch5-3/5_a2l (neuron 6753439)		Sensory	CHO			0	0	0	0	0	0	0	3	0	0			3
1302614	lch5-3/5ish sensory neuron 1302615_a5r		Sensory	CHO			0	0	0	0	0	0	8	1	0	0			9
20429402	lch5-3ish sensory neuron 20429403_t1r		Sensory	CHO			0	0	0	0	0	0	1	0	0	0			1
20281507	lch5-3ish_a7l (sensory neuron 20281508)		Sensory	CHO			0	0	0	0	0	0	0	6	0	0			6
20302953	lch5-3ish_a7r (sensory neuron 20302954)		Sensory	CHO			0	0	1	0	0	0	3	0	0	0			4
7763691	lch5-5 a1l		Sensory	CHO			0	0	0	0	0	0	0	2	0	4			6
7694722	lch5-5 a1r		Sensory	CHO			0	3	0	0	0	0	1	2	1	0			7
16394599	lch5-5ish sensory neuron 16394600		Sensory	CHO			0	0	0	0	0	0	0	1	0	0			1
842303	lch5-5ish sensory neuron_a4r		Sensory	CHO			0	0	0	0	0	0	5	3	0	0			8
20295495	lch5-5ish_a3l (likely) sensory neuron 20295496		Sensory	CHO			0	0	0	0	0	1	0	2	0	0			3
1047461	lch5-5ish_t2l (neuron 1047461)		Sensory	CHO			1	0	0	0	0	0	0	0	0	0			1
7577924	lch5-5ish_t2r		Sensory	CHO			0	0	1	0	0	0	0	9	0	0			10
7210938	lch5-5ish_t3l (neuron 7210939)		Sensory	CHO			2	0	0	0	0	0	1	5	0	5			13
15521040	lch5-5ish_t3r		Sensory	CHO			3	1	0	0	0	0	4	9	5	0			22
853498	lch5? sensory neuron Fragment		Sensory	CHO			0	0	0	0	0	0	3	0	0	0			3
1699916	likely A09h		Interneuron		NB3-5	No	0	0	0	0	0	0	0	0	3	2			5
1075119	likely A26? t2		Interneuron				0	0	0	0	0	0	0	0	1	1			2
20180938	likely Griddle-1 t2r		Interneuron		NB6-2	No	1	0	0	0	0	0	0	0	2	0			3
14522404	NB5-2 lineage 6 (HMD X?)_a1l		Interneuron		NB5-2	No	0	0	7	0	0	0	0	0	0	0			7
11049094	neuron 11049095		Interneuron				0	2	0	0	0	0	0	0	3	3			8
11363015	neuron 11363016		Interneuron				0	0	0	0	0	0	0	0	1	0			1
11364658	neuron 11364659		Interneuron				0	1	0	0	0	0	0	0	0	0			1
12471849	neuron 12471850		Interneuron				0	0	0	0	0	1	0	0	0	0			1
4744385	neuron 4744386		Interneuron				0	1	0	0	0	0	0	0	0	0			1
5856550	neuron 5856551		Interneuron				0	0	0	0	0	1	0	0	0	0			1
6547669	neuron 6547670		Interneuron				0	0	0	0	1	1	0	0	0	0			2
7028408	neuron 7028409		Interneuron				0	0	0	0	2	0	0	0	0	0			2
7185030	neuron 7185031		Interneuron				0	0	0	0	0	2	0	0	0	0			2
7237657	neuron 7237658		Interneuron				0	0	2	0	0	0	0	0	0	0			2
8135422	neuron 8135423 down_octop_met gap		Interneuron				0	0	0	0	1	0	0	0	0	0			1
20019900	neuron work 072018		Interneuron				2	0	0	0	0	0	0	1	0	0			3
16009971	neuron3 (not VLEL)_a1r		Interneuron				0	0	0	0	0	1	0	0	0	0			1
15877900	neuron3 (not VLEL)_a2r		Interneuron				0	0	0	0	0	1	0	0	0	0			1
11579486	NOT a SN (lch5-3 PN a2l)		Interneuron				0	0	0	0	0	0	0	0	1	0			1
2832320	NOT a SN (lch5-5 PN left)		Interneuron				0	0	0	0	0	0	1	0	0	1			2
538171	NOT a SN (not lch5-5 PN right)		Interneuron				0	0	0	0	0	0	0	1	0	0			1
19027624	POSSIBLE ARBOR FOR NPFA1L		Interneuron				0	0	1	0	0	1	0	0	0	0			2
4750778	possible basket fragment		Interneuron				0	0	0	0	0	2	0	0	0	0			2
13020272	potential V arm (left) TODO		Interneuron				0	0	0	0	1	0	0	0	0	0			1
6821326	Pre-goro1_relative_t1l		Interneuron		NB3-5	No	0	0	0	2	2	6	0	0	0	0			10
6121546	Pre-goro1_relative_t1r		Interneuron		NB3-5	No	0	0	2	0	8	4	0	0	0	0			14
6439425	preA08m_t2l		Interneuron				0	0	13	0	1	1	0	0	0	0			15
7209768	revisit gap fragment		Interneuron				1	1	0	0	4	1	0	0	1	0			8
7551677	saddle-type neuron a1r		Interneuron				0	0	1	0	0	0	0	0	0	0			1
7934152	SeIN134 (= Pre-goro7)_right		Interneuron				0	0	0	1	0	0	0	0	0	0			1
5064892	sens		Sensory				0	0	0	0	0	1	0	0	0	0			1
2718786	sensory		Sensory				0	1	0	0	0	0	0	0	0	0			1
1040671	sensory neuron 1040672_a7l		Sensory				0	1	0	0	0	0	0	0	0	0			1
2415188	sensory neuron 2415189		Sensory				0	1	0	0	0	0	0	0	0	0			1
5304793	sensory-looking, but with soma_a3r		Interneuron				0	0	0	1	0	0	4	2	0	2			9
16833134	some drunken a2l		Interneuron		NB3-5	No	0	0	0	0	1	0	0	0	0	0			1
4202827	stuck at 1900-1891 gap 4202828		Interneuron				0	0	0	0	1	2	0	0	0	0			3
18495036	suspect3		Interneuron				0	0	0	0	0	0	0	0	1	0			1
3957604	T05t_t3r		Interneuron		NB3-3	No	0	0	0	1	0	1	0	0	0	0			2
2986525	T06o t2l		Interneuron		NB5-2	No	1	0	0	0	6	3	0	0	3	5			18
2975298	T06o t2r		Interneuron		NB5-2	No	3	0	0	0	3	4	1	0	3	0			14
2331584	T08 neuron 2331584 (paired with 2315731)_t3l		Interneuron		NB3-3	No	0	0	0	0	0	0	2	0	0	0			2
4156473	T08b (neuron 4156474; paired with 16310399)_t3l		Interneuron		NB3-3	No	1	0	1	0	0	1	0	0	0	0			3
1085193	T08z?_t3l		Interneuron				1	0	0	0	0	0	0	0	0	0			1
1931981	T19v_t1r		Interneuron				0	0	1	0	0	0	0	0	0	0			1
5071140	t1l ventral		Interneuron				0	0	0	0	1	0	0	0	0	0			1
16609090	T2 bilateral PN T2l		Interneuron		NB3-3	No	0	0	0	0	0	0	1	0	0	0			1
10763004	T2 bilateral PN T2r		Interneuron		NB3-3	No	0	2	0	0	1	1	0	0	2	2			8
689215	t2l contralateral pre lch5		Interneuron		NB7-1	No	1	0	0	0	0	0	0	0	0	0			1
7699877	t2r contralateral pre lch5		Interneuron		NB7-1	No	1	5	0	0	0	0	0	0	0	0			6
772825	t3 contalateral pre-lch5		Interneuron		NB7-1	No	0	0	0	1	0	0	0	0	0	0			1
5819328	T30?_t1l drunken		Interneuron		NB3-5	No	0	0	0	0	0	4	0	0	0	0			4
5729213	t3r lateral soma		Interneuron				0	0	0	0	0	1	0	0	0	0			1		Total
7169767	telson PN to brain_a7l		Interneuron				0	0	0	0	0	0	1	2	3	1			7
2647140	telson PN to brain_a7r		Interneuron				0	1	0	0	0	0	0	1	2	4			8
6525764	To brain from VNC		Interneuron				0	0	0	0	1	0	0	0	0	0			1		325
6802058	To join a locked skeleton		Interneuron				0	0	0	0	0	1	0	0	0	0			1		1865
5880372	Unfinished - AT GAPS		Interneuron				1	1	0	0	0	0	0	0	0	0			2
10272946	unidentified interneuron		Interneuron				0	0	0	0	0	2	0	0	0	0			2
7801255	v'ch a1l		Sensory	CHO			0	0	0	0	0	0	0	0	0	1			1
7628068	v'ch a1r		Sensory	CHO			0	0	0	0	0	0	0	0	2	0			2
7209350	vch? sensory t2r (neuron 7209351)		Sensory	CHO			1	0	0	0	0	0	0	0	0	0			1
7733871	vchAB_t3r		Sensory	CHO			2	0	0	0	0	0	0	0	0	0			2
10929797	VLEL4_a1l	A08j1	Interneuron	Early-Born EL	NB3-3	Yes	0	0	0	7	9	14	1	1	0	0			32
8198913	VLEL4_a1r	A08j1	Interneuron	Early-Born EL	NB3-3	Yes	0	2	1	0	3	12	2	2	0	0			22
11455472	VLEL9_a1l	A08j3	Interneuron	Early-Born EL	NB3-3	Yes	1	0	0	0	0	2	1	0	0	0			4
8257672	VLEL9_a1r	A08j3	Interneuron	Early-Born EL	NB3-3	Yes	0	0	1	0	0	0	0	1	0	0			2

## Sheet: Summary
	Counts	BASINs	CHOs	EARLY-BORN EL	LADDERs	OTHER	Sub-total (B, CHO, EB, L)	Total
	NEURONS	21	72	20	32	186	145	331
	SYNAPSES	123	603	230	328	661	1284	1945
	percent	BASINs	CHOs	EARLY-BORN EL	LADDERs	OTHER
	NEURONS	0.0634441	0.217523	0.060423	0.0966767	0.561934
	SYNAPSES	0.0632391	0.310026	0.118252	0.168638	0.339846
	Details about other neurons
	Counts	1-2 synapses	3 or more synapses	All
	NEURONS	109	77	186
	SYNAPSES	135	526	661
	percent	1-2 synapses	3 or more synapses
	NEURONS	0.586022	0.413978
	SYNAPSES	0.204236	0.795764

## Sheet: Inputs onto early-born ELs
Neuron Number	Including CB, SEZ, and unknown			(INs + SNs) only				Synapse Number	Including CB, SEZ, and unknown			(INs + SNs) only
LEFT	All synapses onto early-born ELs			All synapses onto early-born ELs				LEFT	All synapses onto early-born ELs			All synapses onto early-born ELs
	neurons	% neurons		neurons	% neurons				synapses	% synapses		synapses	% synapses
Total	367			244				Total	1408			1116
Early-born ELs	16	0.0435967		16	0.0655738			Early-born ELs	96	0.0681818		96	0.0860215
Basins	17	0.0463215		17	0.0696721			Basins	60	0.0426136		60	0.0537634
Ladders	26	0.0708447		26	0.106557			Ladders	193	0.137074		193	0.172939
other INs	254	0.692098		131	0.536885			other INs	737	0.523438		445	0.398746
CHO	54	0.147139		54	0.221311			CHO	322	0.228693		322	0.28853
Percent of total input	all	1			1			sum	all	1			1
	all but 'other INs'	0.307902			0.463115			sum	all but 'other INs'	0.476562			0.601254
Neuron Number	Including CB, SEZ, and unknown			(INs + SNs) only				Synapse Number	Including CB, SEZ, and unknown			(INs + SNs) only
RIGHT	All synapses onto early-born ELs			All synapses onto early-born ELs				RIGHT	All synapses onto early-born ELs			All synapses onto early-born ELs
	neurons	% neurons		neurons	% neurons				synapses	% synapses		synapses	% synapses
Total	362			243				Total	1210			956
Early-born ELs	17	0.0469613		17	0.0699588			Early-born ELs	102	0.0842975		102	0.106695
Basins	14	0.038674		14	0.0576132			Basins	63	0.0520661		63	0.0658996
Ladders	27	0.0745856		27	0.111111			Ladders	135	0.11157		135	0.141213
other INs	90	0.248619		129	0.530864			other INs	629	0.519835		375	0.392259
CHO	58	0.160221		58	0.238683			CHO	281	0.232231		281	0.293933
sum	all	1		all	1			sum	all	1		all	1
sum	all but 'other INs'	0.320442		all but other IN	0.477366			sum	all but 'other INs'	0.480165		all but 'other INs'	0.607741
Neuron Number	Including CB, SEZ, and unknown			(INs + SNs) only				Synapse Number	Including CB, SEZ, and unknown			(INs + SNs) only
L-R COMBINED	All synapses onto early-born ELs			All synapses onto early-born ELs				TOTAL (L+R)	All synapses onto early-born ELs			All synapses onto early-born ELs
	neurons	% neurons		neurons	% neurons				synapses	% synapses		synapses	% synapses
Total	729			487				Total	2618			2072
Early-born ELs	33	0.0452675		33	0.0677618			Early-born ELs	198	0.0756303		198	0.0955598	x
Basins	31	0.042524		31	0.063655			Basins	123	0.0469824		123	0.0593629	x
Ladders	53	0.0727023		53	0.10883			Ladders	328	0.125286		328	0.158301
other INs	344	0.471879		260	0.533881			other INs	1366	0.521772		820	0.395753
CHO	112	0.153635		112	0.229979			CHO	603	0.230328		603	0.291023
sum	all	1		all	1			sum	all	1		all	1
sum	all but 'other INs'	0.314129		all but other IN	0.470226			sum	all but 'other INs'	0.478228		all but 'other INs'	0.604247
		IN = interneuron	interneuron
		SN = sensory neuron
		CB = central brain
		SEZ = subesophageal zone
		CHO = chordotonal sensory neuron

## Sheet: Inputs onto each early-born EL
	A08x_A1L			A08j1_A1L			A08j3_A1L			A08j2_A1L			A08m_A1L
	Synapses from	Percent of all synaptic input	Percent of (INs + CHO only) synaptic input	Synapses from	Percent of all synaptic input	Percent of (INs + CHO only) synaptic input	Synapses from	Percent of all synaptic input	Percent of (INs + CHO only) synaptic input	Synapses from	Percent of all synaptic input	Percent of (INs + CHO only) synaptic input	Synapses from	Percent of all synaptic input	Percent of (INs + CHO only) synaptic input		Combined left-right (INs + CHO only) total
Basins Left	4	0.0162602	0.0218579	0	0	0	0	0	0	0	0	0	1	0.00574713	0.00735294			A08j1-3			A08x			A08m
Basins Right	29	0.117886	0.15847	0	0	0	0	0	0	0	0	0	26	0.149425	0.191176			Average	Stdev		Average	Stdev		Average	Stdev
other A08 Left	26	0.105691	0.142077	0	0	0	18	0.0523256	0.0622837	7	0.027668	0.0380435	2	0.0114943	0.0147059
other A08 Right	2	0.00813008	0.010929	3	0.00773196	0.00872093	19	0.0552326	0.0657439	16	0.0632411	0.0869565	3	0.0172414	0.0220588		Basins Left	0	0		0.0395748	0.0655668		0.00798682	0.000896434
Ladders	31	0.126016	0.169399	47	0.121134	0.136628	63	0.18314	0.217993	52	0.205534	0.282609	0	0	0		Basins Right	0	0		0.136527	0.0715438		0.220588	0.0415945
CHO Left	4	0.0162602	0.0218579	132	0.340206	0.383721	24	0.0697674	0.083045	9	0.0355731	0.048913	0	0	0		other A08 Left	0.0361504	0.0304448		0.146559	0.00633933		0.00735294	0.0103986
CHO Right	6	0.0243902	0.0327869	88	0.226804	0.255814	18	0.0523256	0.0622837	32	0.126482	0.173913	9	0.0517241	0.0661765		other A08 Right	0.0501299	0.0310046		0.0236936	0.018052		0.0110294	0.0155979
																	Ladders	0.222492	0.0574934		0.136783	0.0461262		0.012931	0.0182872
		all	INs + CHOs		all	INs + CHOs		all	INs + CHOs		all	INs + CHOs		all	INs + CHOs		CHO Left	0.173011	0.133176		0.026554	0.0154559		0.0517241	0.073149
Total synapse #		246	183		388	344		344	289		253	184		174	136		CHO Right	0.20734	0.104201		0.0163934	0.00108674		0.0848124	0.0163151
indirect CHO input from	Basin L	Basin R	Ladders	Basin L	Basin R	Ladders	Basin L	Basin R	Ladders	Basin L	Basin R	Ladders	Basin L	Basin R	Ladders
	0.22	0.23	0.32			0.4			0.28			0.27	0.11	0.29	0
	A08x_A1R			A08j1_A1R			A08j3_A1R			A08j2_A1R			A08m_A1R
	Synapses from	Percent of all synaptic input	Percent of (INs + CHO only) synaptic input	Synapses from	Percent of all synaptic input	Percent of (INs + CHO only) synaptic input	Synapses from	Percent of all synaptic input	Percent of (INs + CHO only) synaptic input	Synapses from	Percent of all synaptic input	Percent of (INs + CHO only) synaptic input	Synapses from	Percent of all synaptic input	Percent of (INs + CHO only) synaptic input
Basins Left	22	0.092827	0.114583	0	0	0	0	0	0	0	0	0	1	0.00574713	0.00862069
Basins Right	11	0.0464135	0.0572917	0	0	0	0	0	0	0	0	0	29	0.166667	0.25
other A08 Left	7	0.0295359	0.0364583	1	0.00257732	0.00529101	22	0.0639535	0.077193	6	0.0237154	0.0340909	0	0	0
other A08 Right	29	0.122363	0.151042	3	0.00773196	0.015873	19	0.0552326	0.0666667	10	0.0395257	0.0568182	0	0	0
Ladders	20	0.0843882	0.104167	55	0.141753	0.291005	56	0.162791	0.196491	37	0.146245	0.210227	3	0.0172414	0.0258621
CHO Left	0	0	0	53	0.136598	0.280423	22	0.0639535	0.077193	29	0.114625	0.164773	12	0.0689655	0.103448
CHO Right	6	0.0253165	0.03125	70	0.180412	0.37037	44	0.127907	0.154386	40	0.158103	0.227273	5	0.0287356	0.0431034
		all	INs + CHOs		all	INs + CHOs		all	INs + CHOs		all	INs + CHOs		all	INs + CHOs
Total synapse #		237	192		241	189		351	285		242	176		139	116
indirect CHO input from	Basin L	Basin R	Ladders	Basin L	Basin R	Ladders	Basin L	Basin R	Ladders	Basin L	Basin R	Ladders	Basin L	Basin R	Ladders
	0.24	0.27	0.32			0.4			0.3			0.28	0	0.25	42
		IN = interneuron
		SN = sensory neuron
		CB = central brain
		SEZ = subesophageal zone
		CHO = chordotonal sensory neuron
