# Supplementary material for: Sequential addition of neuronal stem cell temporal cohorts generates a feed-forward circuit in the Drosophila larval nerve cord
Source: eLife. 2022 Jun 20;11:e79276. doi: 10.7554/eLife.79276 (PMC9333992; doi:10.7554/eLife.79276)
Supplement: Supplementary file 6. [file elife-79276-supp6.xlsx]

## Sheet: Sheet1
Neuron name	segment	Morphological class		Lineage	inferred or confirmed		Later born than early-born ELs in A1	inferred or confirmed
lch5-2/4	A1L/R	CHO		N/A	N/A		N/A	N/A
lch5-2/4	A1L/R	CHO		N/A	N/A		N/A	N/A
lch5-2/4	A3L/R	CHO		N/A	N/A		N/A	N/A
lch5-2/4	A4L/R	CHO		N/A	N/A		N/A	N/A
lch5-2/4	A4L/R	CHO		N/A	N/A		N/A	N/A
lch5-2/4	A5L/R	CHO		N/A	N/A		N/A	N/A
lch5-2/4	A5L/R	CHO		N/A	N/A		N/A	N/A
lch5-2/4	A6L/R	CHO		N/A	N/A		N/A	N/A
lch5-2/4	A7L/R	CHO		N/A	N/A		N/A	N/A
lch5-2/4	A7L/R	CHO		N/A	N/A		N/A	N/A
lch5-2/4	A8-9L/R	CHO		N/A	N/A		N/A	N/A
lch5-2/4	A9L/R	CHO		N/A	N/A		N/A	N/A
lch5-2/4	other	CHO		N/A	N/A		N/A	N/A
lch5-2/4	T2L/R	CHO		N/A	N/A		N/A	N/A
lch5-2/4	T2L/R	CHO		N/A	N/A		N/A	N/A
lch5-5ish	T2L/R	CHO		N/A	N/A		N/A	N/A
lch5-5ish	T3L/R	CHO		N/A	N/A		N/A	N/A
Ladder-d	A1 unpaired	Ladder		MNB	confirmed		later	confirmed
Ladder-f	A1 unpaired	Ladder		MNB	confirmed		later	confirmed
Ladder-d	A2 unparied	Ladder		MNB	confirmed		later	confirmed
Ladder-e	A2 unparied	Ladder		MNB	confirmed		later	confirmed
Ladder-f	A2 unparied	Ladder		MNB	confirmed		later	confirmed
Ladder	A3 unpaired	Ladder		MNB	confirmed		later	confirmed
Ladder	A3 unpaired	Ladder		MNB	confirmed		later	confirmed
Ladder-d	A4 unparied	Ladder		MNB	confirmed		later	confirmed
Ladder	T1 unpaired	Ladder		MNB	confirmed		later	confirmed
Ladder	T1 unpaired	Ladder		MNB	confirmed		later	confirmed
Ladder(2)	T2 unpaired	Ladder		MNB	confirmed		later	confirmed
Ladder(3)	T2 unpaired	Ladder		MNB	confirmed		later	confirmed
Ladder	T3 unpaired	Ladder		MNB	confirmed		later	confirmed
Ladder-a	T3 unpaired	Ladder		MNB	confirmed		later	confirmed
A08j2	A1L/R	Early-Born EL		NB3-3	confirmed		not later born	confirmed
VLEL4	A1L/R	Early-Born EL		NB3-3	confirmed		not later born	confirmed
A08j2	A2L/R	Early-Born EL		NB3-3	confirmed		not later born	confirmed
A08v	T2L/R	Early-Born EL		NB3-3	confirmed		not later born	confirmed
Basin-2	T3L/R	Basin		NB3-5	confirmed		later	confirmed
Basin-1	A2L/R	Basin		NB3-5	confirmed		later	confirmed
Basin-1	A1L/R	Basin		NB3-5	confirmed		later	confirmed
Pre-goro1 relative	T1L/R			NB3-5	inferred		later	inferred
T06o	T2L/R			NB5-2	inferred		ambigous	inferred
A03 (upstream of A08m)	A1L/R			NB7-1	confirmed		later	confirmed
hook-1	A1L/R			NB1-2	inferred		later	inferred
A10j	A3L/R			NB2-2	inferred		later	inferred
A12h	A4L/R			NB6-1	inferred		not later born	inferred
