# Supplementary figures and images for: Sequential addition of neuronal stem cell temporal cohorts generates a feed-forward circuit in the Drosophila larval nerve cord
Source: eLife journal article supplement (doi:10.7554/elife.79276), 2022-06-20

A Design of NB3-3-GAL4

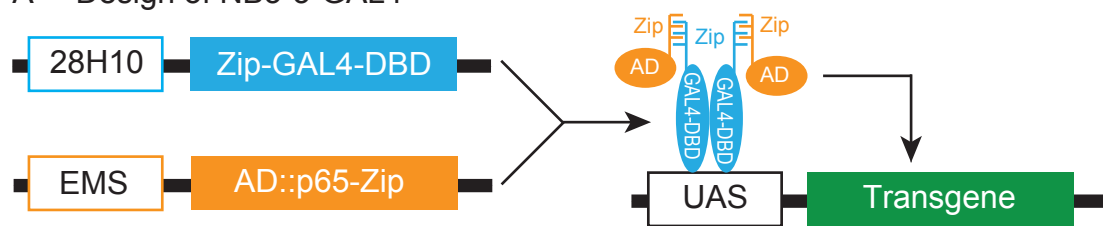

*NB3-3>membrane-GFP*

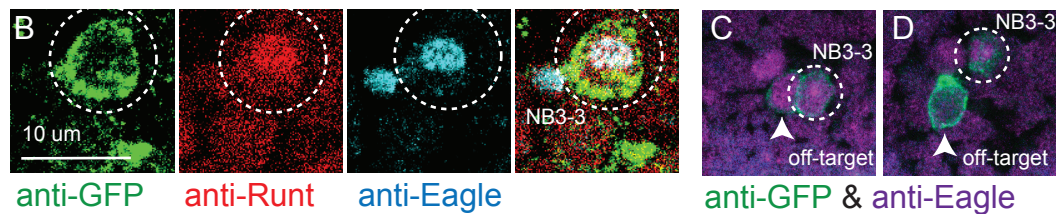

Figure 1-figure supplement 1

Supplement: supp [file elife-79276-supp-v1.zip]
